# Supplementary material for: Multiscalar 3D characterisation of the Mid-Norwegian passive margin evolution, Central Norway: A multi-technique approach to unravelling the structural characteristics and tectonic history of offshore basement highs
Source: Copernicus journal article supplement (doi:10.5194/egusphere-2023-2504), 2023-11-08
Supplement: Supplementary file [file egusphere-2023-2504-RC1-supplement.pdf]

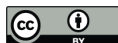

# Multiscalar 3D characterisation of the Mid-Norwegian passive margin evolution, Central Norway: A multi-technique approach to unravelling the structural characteristics and tectonic history of offshore basement highs

Matthew S. Hodge<sup>1\*</sup>, Guri Venvik<sup>2</sup>, Jochen Knies<sup>2</sup>, Roelant van der Lelij<sup>2</sup>, Jasmin Schönenberger<sup>2</sup>,  
5 Øystein Nordgulen<sup>2</sup>, Marco Brønner<sup>2</sup>, Aziz Nasuti<sup>2</sup>, & Giulio Viola<sup>1</sup>

1: Department of Biological, Geological and Environmental Sciences, University of Bologna, Italy

2: Geological Survey of Norway (NGU), Trondheim, Norway

Correspondence to: Matthew S. Hodge (matthew.hodge@unibo.it)

**Abstract.** Smøla Island, situated within the Mid-Norwegian passive margin, contains crystalline basement-hosted intricate  
10 fracture and fault arrays formed during a polyphase brittle tectonic evolution. Understanding similar fracture patterns within  
basement structural highs offshore, which is crucial in that they are commonly associated with unconventional hydrocarbon  
reservoirs, remains challenging owing to the lack of rock exposure and geological and chronological constraints. As Smøla is  
an onshore analogue for basement highs offshore, any insights can therefore be applied to the offshore domain. In this study,  
we present a multiscalar multi-technique approach whereby various 2D and 3D field, drilling, geophysical, and K-Ar  
15 geochronology datasets are integrated to unravel the brittle evolution of Smøla and the surrounding margin. On the regional-  
scale, geophysical and DTM data-derived lineament analysis, along with local-scale field mapping, high resolution logging of  
four diamond drill holes, 3D modelling, and petrographic and microstructural analyses indicate that at least five deformation  
episodes affected Smøla through time. These deformation episodes are characterised by different geometric and kinematic  
20 structures are associated with syn to post-Devonian brittle sinistral transtension during post-Caledonian extension of the  
margin; II) NE-SW or NW-SE striking sericite-chlorite-calcite shear features formed from two separate brittle-ductile phases,  
which are related with both sinistral and later dextral strike-slip faulting during the Carboniferous to Late Triassic (~300 Ma  
to ~200 Ma); III) NE-SW, NNE-SSW striking chloritic-hematite breccias and gouges, linked to crustal extension, normal  
faulting, basin development (~200 Ma to ~100 Ma); IV) NE-SW to NNW-SSE and WNW-ESE striking hematite-zeolite-  
25 calcite veins and hydraulic breccias, likely associated to both late Mesozoic dextral strike-slip faulting, and regional ~E-W  
crustal extension (younger than ~150 Ma to ~75 Ma); and V) the last recorded episode characterised by NW-SE, WNW-ESE  
and NNE-SSW striking quartz-calcite veins cross-cutting all previous deformation features, associated with ~E-W to NE-SW  
crustal extension during the Cretaceous to Paleogene. Accordingly, 3D modelling of selected structures, by deformation



episode, reproduce the complex brittle arrays on Smøla through time. The structural modelling also highlights the multiscale  
30 nature of basement deformation features, with modelled down-dip and strike extents of the structures varying by D<sub>1</sub>-D<sub>5</sub>.  
Overall, this ‘toolbox’ approach makes it possible to unravel the complex brittle deformation history of Smøla and the wider  
Mid-Norwegian margin and can be applied to other basement highs offshore Norway and elsewhere.

## 1 Introduction

Offshore crystalline basement highs are important structural elements of rifted passive margins (Peron-Pinvidic et al., 2013;  
35 Zastrozhnov et al., 2020). They are, however, very challenging to study when in deep oceanic waters and beneath younger  
sedimentary cover. Constraining their structural characteristics and tectonic evolution in those settings typically relies on  
relatively low-resolution datasets, such as seismic surveys and scattered drill hole data (e.g., Holdsworth et al., 2019; Tanner  
et al., 2020), which limits detailed reconstructions. Most of the geological knowledge on offshore basement highs derives from  
40 hydrocarbon exploration work, which, however, until recently only focussed on and around their outermost edges, with limited  
interest in the basement volumes themselves (Riber et al., 2015). On the other hand, following indications that fractured and  
weathered basement may represent productive unconventional hydrocarbon reservoirs or act as pathways for oil and gas  
migration, they have also recently begun to receive considerable attention (e.g., Hartz et al., 2013; Trice, 2014; Riber et al.,  
2015; Belaidi et al., 2018; Holdsworth et al., 2019).

45 In particular, in addition to reconstructing the details of their geological history, research has specifically focused on  
understanding basement-related permeability and fluid storage potential (e.g., Ceccato et al., 2021) as driven by the local  
pervasive fracture and fault systems (Stober & Bucher, 2007), together with rock weathering, seismic-resolution fracture  
patterns, bounding fault structures, and controls on the basement high geometries (e.g., Bonter & Trice, 2019; Faleide et al.,  
2008; Muñoz-Barrera et al., 2020; Rønning & Elvebakk, 2005; Skilbrei et al., 2002).

50 Crucially, a conceptual ‘gap’ remains relating to the understanding of the effective role of ‘intrabasement’ structures in an  
offshore context. These structures offshore are difficult to study because they are commonly sub-seismic resolution-scale in  
size (Tanner et al., 2020). Consequently, characterising geological structures that range in size from the sub-seismic resolution  
55 through to regional-scales, and resolving a related and potentially long-lived tectonic evolution, cannot be done from low  
resolution data alone. To mitigate these challenges, analogue onshore basement exposures are attracting researchers’ attention  
as they provide significant advantages such as more extensive and ready site access, and data availability at regional to micro-  
scale resolutions.

Smøla Island, within the Mid-Norwegian passive margin, is a subaerial exposure of crystalline basement rocks (Fig. 1). The  
60 island is an ideal natural laboratory where to study an analogue of basement highs offshore Central Norway, owing to both its

proximity to the offshore Frøya High, and the similarity of basement geology found at both locations (Rønning and Elvebakk, 2005; Slagstad et al., 2011). As such, Smøla represents a wealthy archive of evidence of local and regional-scale structural features, which, if properly interpreted, may yield much information on the tectonic episodes that have affected the margin through time. Any geological insights from Smøla could then potentially be applied to basement highs offshore, thus aiding  
65 the reconstruction of their tectonic evolution and improving hydrocarbon exploration strategies.

The tectonic evolution of onshore basement exposures along the Norwegian passive margin has been worked on by, amongst others, Redfield et al. (2004), Davids et al. (2013), Viola et al. (2016), Ksienzyk et al. (2016), Scheiber et al. (2016), Scheiber and Viola (2018), and Fossen et al. (2021), with the most recent insights over the Mid-Norwegian portion by Tartaglia et al.  
70 (2022). Although previous studies provide tight constraints, applying a novel multi-technique and multiscale approach to unravelling complex deformation patterns on an onshore basement exposure may provide important new insights to this existing work.

Here we describe and test a comprehensive workflow for characterising onshore basement blocks. The adopted tools include  
75 surface geological- (outcrop mapping and sampling), structural and petrographical, in addition to regional datasets (airborne magnetic surveys and digital terrain models - DTMs). This approach is further augmented by an unprecedented 3D perspective afforded by four oriented diamond drill holes. They provide fresh basement exposures and insights into complex structures down to the centimetric scale.

80 Aided by this multiscale 3D approach we ~~expand on the existing tectonic evolution models for the Mid-Norwegian passive margin.~~ We describe and classify the variety of basement-hosted multiscale deformation features present in regional aeromagnetic imagery, DTM's, drill core, field outcrops, and thin sections. This approach is further strengthened by applying K-Ar geochronology, which constrains the absolute time dimension of the reconstructed tectonic phases. Finally, as fault and fracture arrays in crystalline basement rocks control the local secondary permeability (Gillespie et al., 2020), our work has  
85 implications on understanding offshore basement high-hosted unconventional hydrocarbon reservoirs, and basement deformation more generally, providing crucial deterministic inputs to future studies aiming to model basement fracturing and petrophysical behaviour.

## 2 Geological framework

### 2.1 Regional perspective

90 Smøla Island, located in Central Norway, is set within the Mid-Norwegian passive margin, (Figure 1A), a region shaped by a prolonged and complex geological history (Peron-Pinvidic & Osmundsen, 2020). The island (Figure 1B) is comprised by  $445.7 \pm 3.8$  Ma plutonic magmatic-arc rocks (Tucker et al., 2004; Slagstad et al., 2011) and oceanic crustal units, all of which were



emplaced and accreted just prior to the Silurian-Devonian (~430 Ma) Scandian Phase of the Caledonian Orogeny (Corfu et al., 2014; Gee et al., 2008; Slagstad & Kirkland, 2018; Tucker et al., 2004). Caledonian shortening led to nappe and thrust fault  
95 development, with transposition of the Smøla rocks along major detachments over both the allochthonous continental Neoproterozoic Baltoscandian nappes and the underlying autochthonous Palaeo- to Mesoproterozoic Baltican crystalline basement of the Western Gneiss Region (WGR) (Fossen, 1992; Tucker et al., 2004; Corfu et al., 2014) (Figure 1C).

During the Early Devonian (Late Caledonian times), orogenic collapse of the by then overthickened orogen resulted in  
100 significant crustal extension by both reactivation of favourably oriented contractional structures (Fossen, 2010; Fossen et al., 2017) and development of new crustal-scale extensional shear zones and exhumation (Figure 1) (Osmundsen et al., 2006). Late Caledonian extension also caused the Smøla rocks to be translated, with both strike-slip offset and down-faulting across the Møre-Trøndelag Fault Complex (MTFC), a regional fault system with multiple strands and complex kinematics that was repeatedly activated through time (Redfield et al., 2004; Watts et al., 2023). Smøla experienced limited metamorphic overprint  
105 (on average sub-greenschist facies conditions) and only localised ductile deformation (Tucker et al., 2004). Also associated with the Devonian tectonic inversion, extensional (possible pull-apart) basins formed in response to brittle extensional faulting, such as the MTFC-related Edøyfjorden Basin proximal to Smøla (Bøe et al., 1989; Bøe & Bjerkli, 1989; Fossen et al., 2017; Osmundsen et al., 2006).

110 Post-Caledonian extension and rifting continued to the Late Cretaceous/Early Palaeocene, eventually leading to the break-up of Greenland from the Eurasia plate at ~54 Ma and opening of the North Atlantic (Peron-Pinvidic and Osmundsen, 2018; Bunkholt et al., 2022).

During this time, the Mid-Norwegian passive margin first formed and then underwent several tectonic phases which include  
115 rift initiation during the Carboniferous, crustal stretching and rifting during the Permo-Triassic, Late-Triassic to Jurassic crustal thinning, renewed Mid-Jurassic to Early Cretaceous rifting with hyper-extension of the margin during the Late-Cretaceous to Paleocene, and early seafloor formation and spreading during the Paleocene-Eocene (Mosar et al., 2002; Faleide et al., 2008; Peron-Pinvidic and Osmundsen, 2018).



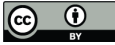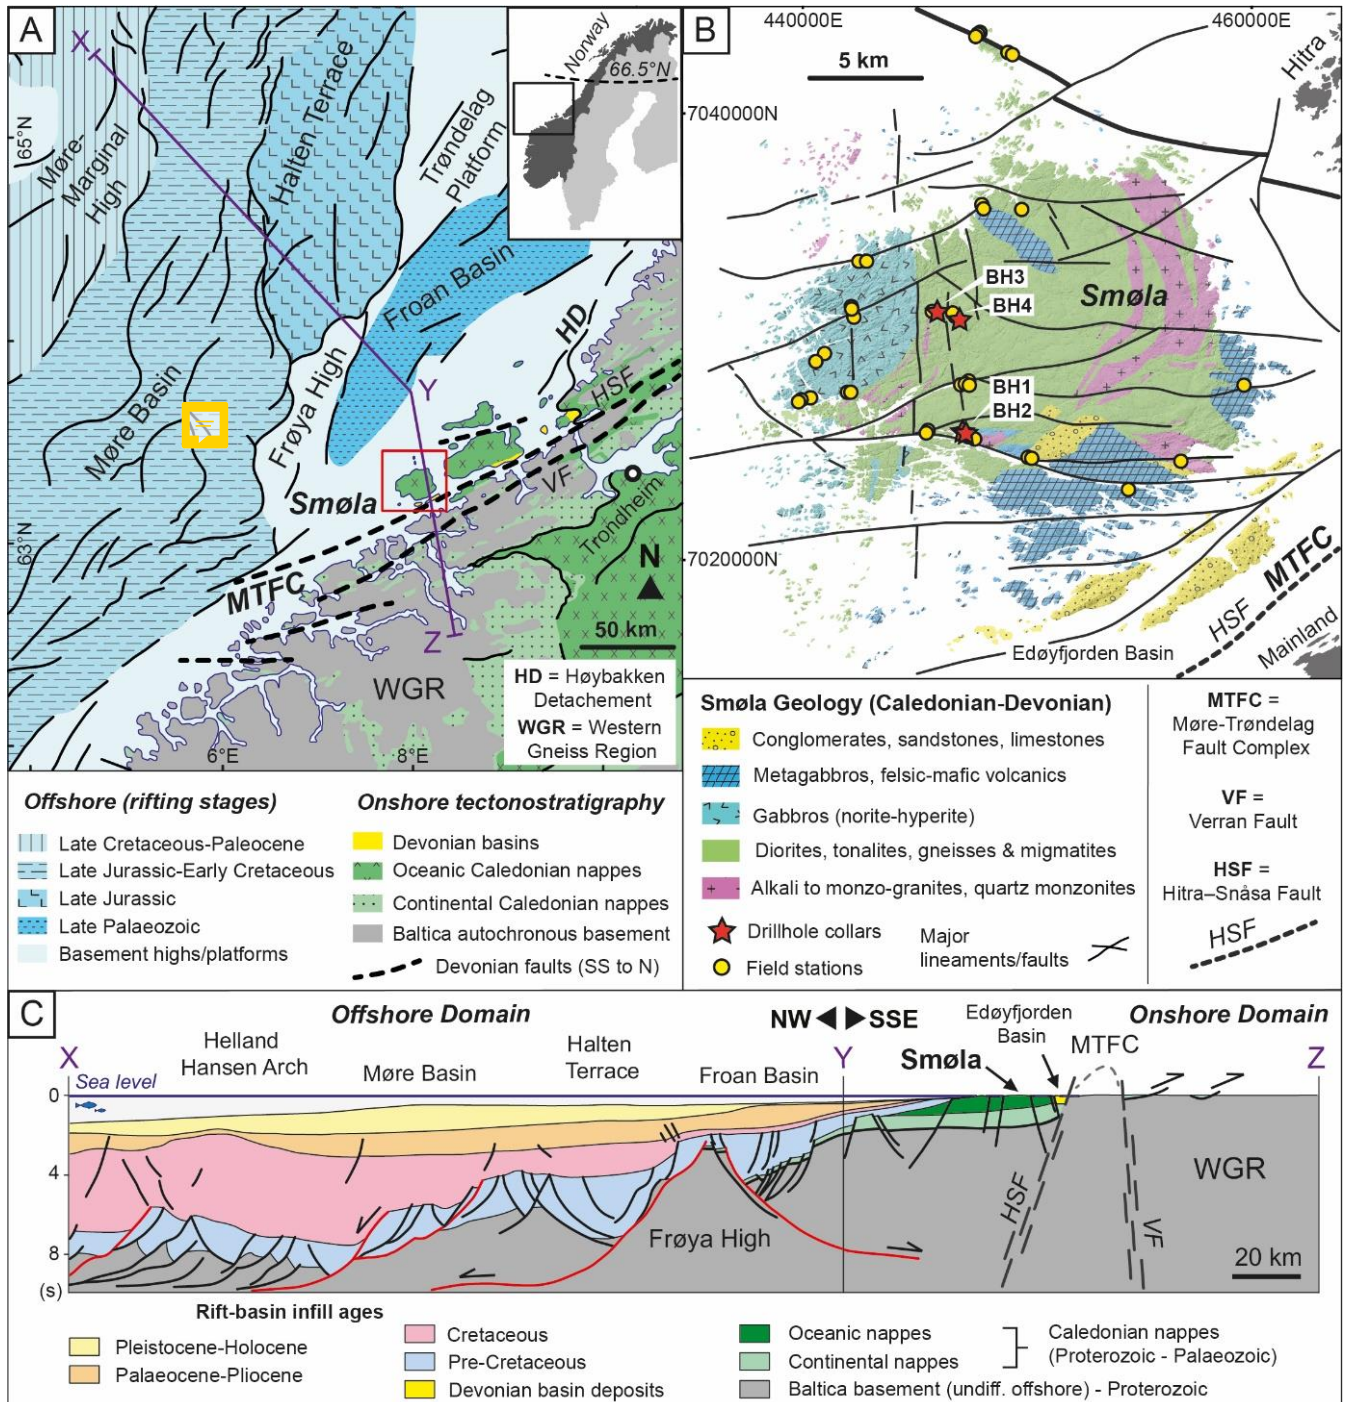

120

125

**Figure 1.** Summary figure detailing the geological context of Smøla Island, Central Norway. **A)** Regional setting of Smøla on the Mid-Norwegian Passive margin. Smøla is separated from the Western Gneiss Region (WGR) by the Møre-Trøndelag Fault Complex (MTFC), with two fault strands, the Hitra-Snåsa Fault (HSF) and the Verran Fault (VF). The Høybakken Detachment (HD) is shown to the NE of Smøla. To the NW of Smøla, in the offshore domain, major basins are present (e.g., Møre Basin), bound by normal faults and structural highs (e.g., Frøya High) (modified from Faleide et al., 2008; Bedrock map of Norway, Geological Survey

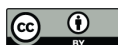

of Norway, 2021). **B) The local geology of Smøla Island, showing the Caledonian and Devonian geology. Significant lineaments and faults (interpreted from airborne geophysics, DTM, and field studies) crosscut the island. The trace of the MTFC (HSF strand) is indicated. The drill holes (red stars) and outcrop mapping locations (yellow circles) are shown** (modified from Fediuk and Siedlecki, 1977). **C) Onshore-offshore interpretive geological cross section (X-Y-Z) as shown in Panel A, showing major regional structures and crustal anatomy relative to Smøla. Including the two strands of the MTFC (HSF and VF) and the Frøya High offshore** (modified from Zastrozhnov et al., 2020).

These events produced discrete generations of basins (such as the Froan, Vøring, and Møre Basins) along the newly-forming Norwegian shelf, which progressively infilled with synrift sediments (Figure 1A & C) (Faleide et al., 2008; Zastrozhnov et al., 2020). In places, structural highs of Caledonian-aged and underlying Baltica crystalline basement, such as the Frøya High to the NW of Smøla formed through rift-related exhumation between these basins (Muñoz-Barrera et al., 2020) leading to remarkable host and graben series. Bounding the structural highs and the different basins, are crustal-scale extensional faults (Figure 1A & C) (Mosar et al., 2002; Skilbrei et al., 2002). Overall, this protracted rifting and hyper-extension history resulted in a highly attenuated offshore domain, reactivating, and overprinting the existing Caledonian deformation features (Figure 1A & C) (Mosar et al., 2002; Zastrozhnov et al., 2020).

## 2.2 The geology of Smøla

Smøla is composed of several Caledonian-aged bedrock types traditionally attributed to the Caledonian Upper Allochthon (Roberts & Gee, 1985) (Figure 1B), including diorite (the most common lithology), gabbro, tonalite, alkali granite, quartz monzonite to monzo-granite, quartz-feldspar and amphibolite-biotite gneiss, limestone and volcanic rocks (andesitic to rhyolitic in composition in a faulted block on the SE-portion of Smøla). Late, felsic to mafic dykes crosscut all other rock types (Brunton & Bockelie, 1979; Fediuk & Siedlecki, 1977; H. Gautneb, 1988; Ha. Gautneb & Roberts, 1989; Roberts, 1980). In addition to the  $445.7 \pm 3.8$  Ma ( $1\sigma$ ) U/Pb intrusive age of a dated granodiorite (Tucker et al., 2004), a granitic dyke was dated to  $428 \pm 10$  Ma ( $2\sigma$ ) (Rb/Sr) (H. Gautneb, 1988), providing an Ordovician-Silurian age envelope for the plutonic rocks on the island. To the S and SE of Smøla (e.g., Edøyfjorden Basin – Figure 1B) the Caledonian bedrock is unconformably overlain by the late Silurian-mid Devonian sedimentary cover of the Smøla Group, and later Jurassic-Cretaceous sedimentary successions (Bøe et al., 1989; Bøe & Bjerkli, 1989; Fediuk & Siedlecki, 1977). These include siliciclastic deposits of red-oxidised polymictic conglomerate, siltstone, and sandstone (Bøe et al., 1989), and infill Devonian extensional basins along the MTFC (Bøe & Bjerkli, 1989).

Continuing to the S and SE of Smøla (and bounding the Devonian basin), the NE-SW striking MTFC is the most proximal and dominant regional-scale structural feature to the island. This wide (10 to 50 km) structure extends for >600 km from Central Trøndelag into the northern-part of the North Sea, and branches into two sub-parallel strands, the Hitra–Snåsa Fault (HSF) to the NW (the most proximal to Smøla), and the Verran Fault (VF) to the SE (Figure 1A, B, & C) (Olsen et al., 2007; Watts, 2001; Watts et al., 2023). The kinematic evolution of the MTFC is complex, with a polyphase deformation history from the Devonian until the Cenozoic (e.g., Grønlie and Roberts, 1989; Seranne, 1992; Watts, 2001; Redfield et al., 2004; Tartaglia et



160 al., 2022; Watts et al., 2023). In comparison to the MTFC and the wider margin, the post-Caledonian structural evolution of Smøla remains poorly investigated and understood.

### 3 The applied toolbox

This study's multi-technique approach involves a variety of 2D and 3D datasets, ranging from the regional-scale through to the micro-scale. Integrated into this array of datasets is also the absolute time dimension, provided through K-Ar  
165 geochronology of structurally well-characterised fault rocks, which provides chronological constraints on all other datasets. We briefly outline below the applied toolbox, with a more detailed description in the supplementary material.

#### 3.1 Geophysical and remote sensing data and lineament mapping

The geophysical data used in this study was acquired by the Geological Survey of Norway (NGU) (Nasuti et al., 2015), with details on survey parameters and data processing available in the supplementary material. Our lineament picking and mapping  
170 followed White (2014) and Scheiber and Viola (2018), making use of both the magnetic geophysical and DTM imagery within a geographic information systems (GIS) software platform (Figure 2). The description of the methodology used to identify and place the lineaments is also available in the supplementary [document](#).

#### 3.2 Drill hole logging and field methods

Geological features in the drill cores (Figure 3) were systematically logged downhole (for a total investigated length of 364.9  
175 m) of diamond drill core, recording lithology and rock alteration, deformation types, fracture/fault characteristics, mineral infill, and cross-cutting relationships. The methodology used to measure structural data in drill core followed both the methods of Holcombe (2013) and Blenkinsop et al. (2015). A more detailed description of the methodology is available in the supplementary material. The field-based structural data acquisition involved [typical field methods](#), which initially aimed at ground-truthing possible exposed deformation zones identified in the lineament mapping, and the systematic mapping of  
180 representative outcrops (Figure 1B). In [total](#) sixty-six outcrop sites were studied, with [data collected](#) recording deformation feature types, fracture/vein mineral infill, fault slip information, host rock lithology, and cross-cutting/genetic relationships between the various features.

#### 3.3 X-ray diffraction and K-Ar dating

Seven structurally-controlled fault gouge and breccia samples were collected ([Figure 8](#)) from fault and deformation zones in  
185 both drill core and outcrop, and subsequently processed at the dedicated NGU laboratory in Trondheim, Norway. Initially, all the samples were disintegrated and separated into <0.1 µm, 0.1-0.4 µm, 0.4-2 µm, 2-6 µm, 6-10 µm size fractions. Each of these size fractions then underwent quantitative analysis for both potassium (K) and argon (Ar) using total digest ICP-OES, and a Isotopx NGX multi collector noble gas mass spectrometer system respectfully. X-ray diffraction (XRD) analysis was



performed on each fraction to determine and quantify the mineralogical composition. A full description of both XRD and the  
190 K-Ar analysis methodology is available in the supplementary material and in Viola et al. (2018).

## 4 Results

### 4.1 Lineament mapping from geophysics and DTM data

The analysis of regional-scale features such as geophysical lineaments and topographic features (Figure 2) formed the initial  
stage of the study. These features occur on the kilometre-scale and can be traced over large areas both off- and onshore.

195

The >2000 mapped lineaments are linear to curvilinear and at times irregular features and crosscut or separate the different  
magnetic blocks discussed above. The lineaments are classified based on length and hierarchy of formation: 1<sup>st</sup> order  
lineaments are potentially major regional structures, while 2<sup>nd</sup> order lineaments are commonly major splays or secondary  
structures off the 1<sup>st</sup> order lineaments, or form domain boundaries between magnetic blocks, and are commonly >10 km in  
200 length; 3<sup>rd</sup> order lineaments are all the other lineaments, which are typically <10 km in length.

Together, the 1<sup>st</sup>, 2<sup>nd</sup>, and 3<sup>rd</sup> order lineaments possess at least eight dominant orientation trends over the study area, with  
various age and cross-cutting relationships between the different lineament trends. These age relationships and the spatial  
distribution of the specific lineament trends by domain area are summarised in Table 1, and selectively illustrated in Figure  
205 2B.



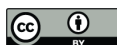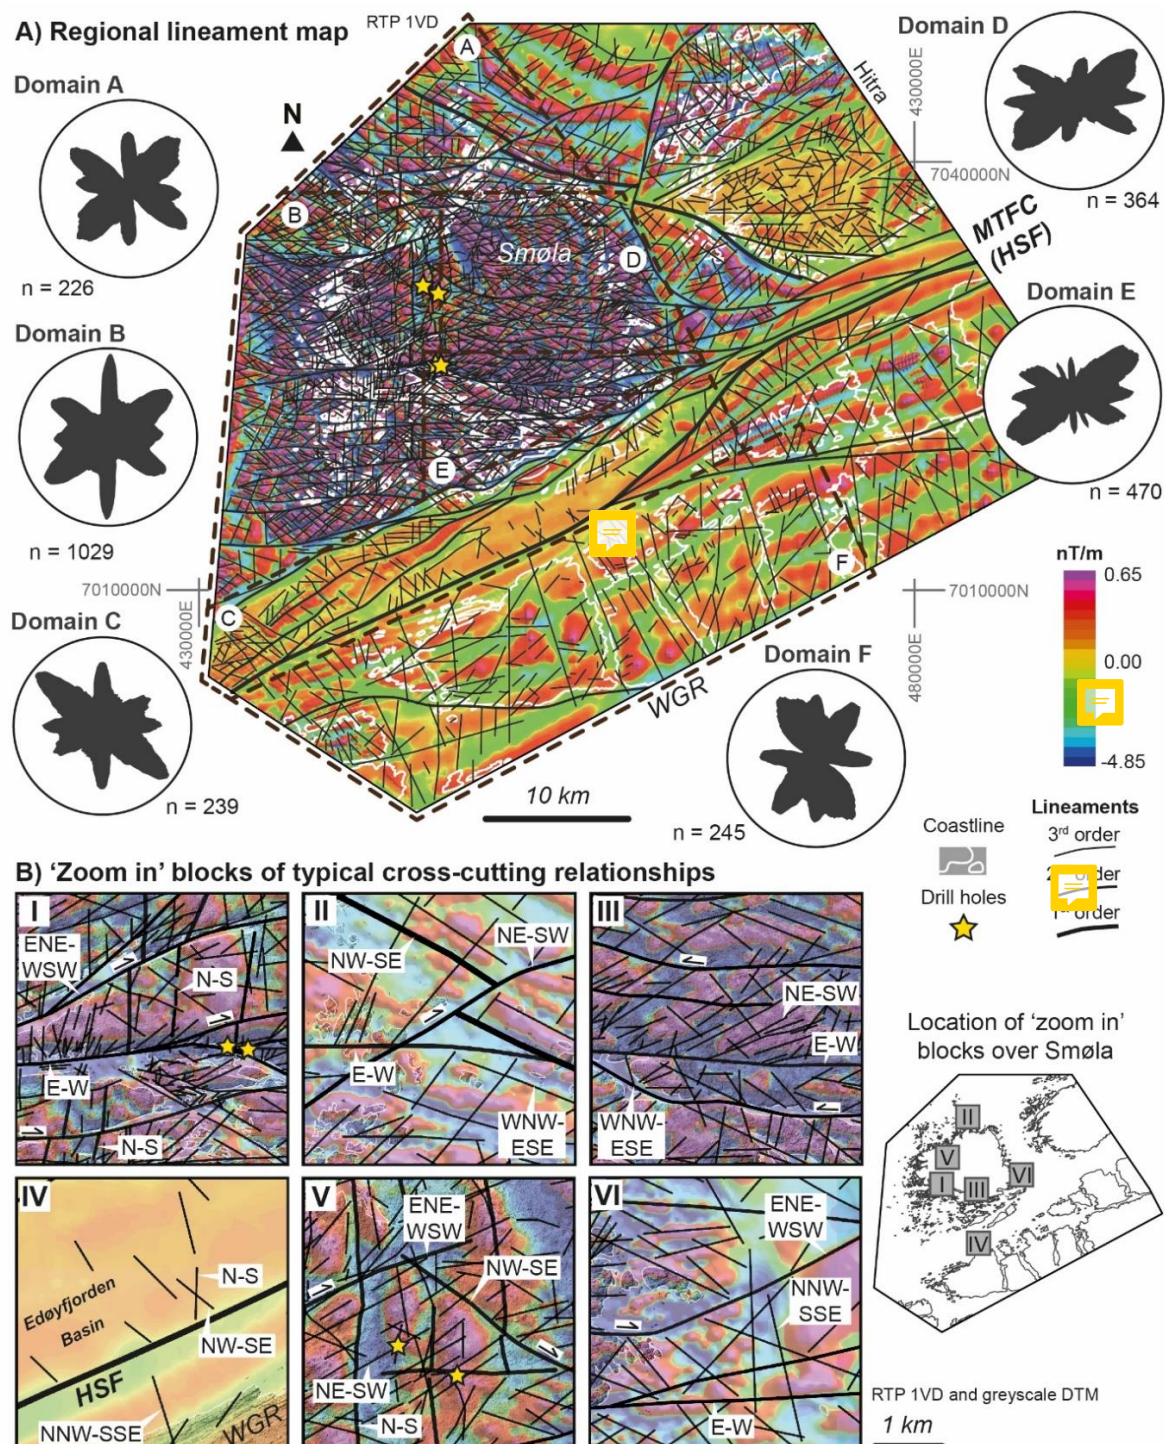

**Figure 2. A)** Airborne magnetic survey imagery (reduced to pole – first vertical derivative (RTP-1VD)) over Smøla Island and surrounding areas (coastline shown in white). Displayed over the magnetic imagery are 1st, 2nd, and 3rd order lineaments mapped



210 from both the magnetic data and DTM data. Airborne magnetic survey imagery from Nasuti et al. (2015). The area over Smøla onto the WGR region is dominated A (north of Smøla), B (western and SW of Smøla), C (area over the MTFC), D (NE Smøla), E (SE Smøla), and F (WGR area). Rose plots of strike trends of mapped lineaments are shown by domain. B) ‘Zoom in’ blocks showing representative examples of cross-cutting relationships between the different lineament trends. Locations of the ‘zoom in’ blocks are displayed on the adjacent schematic map of Smøla.

215

**Table 1.** Age relationship matrix between the main lineament trends, with the occurrence and relative abundance (letter order) in the domain areas of Figure 2. Relationship types include m = mutual cross-cutting, x(s) = cross-cutting with sinistral offset, x(d) = cross-cutting with dextral offset, x(i) cross-cutting with dip-slip offset, x(r)=cross-cutting with reactivation of older lineament, a = abutting/terminating.

| Lineaments | Younger |            |             |             |       |         |         |          | Domain        |
|------------|---------|------------|-------------|-------------|-------|---------|---------|----------|---------------|
|            | N-S     | NW-SE      | E-W         | ENE-WSW     | NE-SW | WNW-ESE | NNE-SSW | NNW-SSE  |               |
| N-S        |         | m, x(d)    | x(d, s, i?) | x(d, s, i?) | x(d)  | x(s)    | x       | x, a     | B, A, C, F    |
| NW-SE      | m       |            | x(d)        | x(d, s)     | x(d)  | x(s)    | x       | m, a     | B, D, E, A, C |
| E-W        |         | x(r)       |             | m           | a     | m       | a,x     | x, a     | E, D, C, A    |
| ENE-WSW    |         |            | m           |             | a     | x(s)    | x?      | x        | C, B          |
| NE-SW      |         | a, x(d, r) |             |             |       | a       | x, a    | x(i?), a | A, D, E, B, F |
| WNW-ESE    |         |            | m           |             | a     |         | a       | x?       | A, F          |
| NNE-SSW    |         |            | m, x(r)     | x(r)        |       |         |         | m?       | D, B          |
| NNW-SSE    |         | m          |             |             |       |         | m?      |          | F, E          |

220

The N-S lineaments, typically 3<sup>rd</sup> to 2<sup>nd</sup> order lineaments, are cross-cut by all other lineaments, except for the NNW-SSE lineaments which, in places, **abut** against the N-S lineaments (Figure 2B.I). The N-S and NW-SE lineaments are likely coeval or conjugate owing to their local mutual cross-cutting relationships. The N-S and E-W, ENE-WSW lineaments have complex cross-cutting relationships (Figure 2B.I and B.V), with the N-S lineaments being dextrally, sinistrally, and possibly dip-slip offset (possible multiple reactivations) in places. The N-S lineaments are most common in the western-part of Smøla and offshore, within Domains B and A. The NW-SE lineaments are similarly offset by many of the other lineaments (Figure 2B.II), although the E-W lineaments only dextrally offset the NW-SE lineaments (Figure 2B.III), and there is no apparent dip-slip offset by any other lineaments. The NW-SE lineaments offset the E-W and the NE-SW lineaments, as well as the magnetic grain (Figure 2B.V), but this may be due to later reactivations (typically dextral offsets). The NW-SE and the NNW-SSE lineaments have rare mutual cross-cutting relationships (Figure 2B.VI), but otherwise the NNW-SSE tend to terminate up against the NW-SE lineaments. The NW-SE lineaments are most common over domains B, D, E, and in the north in Domain A.

235 The E-W lineaments, frequently classed as 2<sup>nd</sup> order lineaments and representing possible fault splays or Riedel shears off the 1<sup>st</sup> order lineament representing the HSF (Figure 2A), are cross-cut by NW-SE, NNE-SSW and NNW-SSE lineaments (Figure 2B.II, B.III). The E-W lineaments also exhibit mutual cross-cutting (potentially coeval) relationships with ENE-WSW (which



are splays of the E-W structures) and WNW-ESE (Figure 2B.I, B.III) lineaments. All three lineament trends possess similar cross-cutting relationships with the other lineaments, although the WNW-ESE lineaments only sinistrally offset both the N-S and NW-SE lineaments, with no local dextral offset. The NE-SW lineaments are clustered on and abut against the N/NE sides of the E-W lineaments and the WNW-ESE rotations (Figure 2B.I, B.III), possibly representing 3<sup>rd</sup> order Riedel shears or splays off the 2<sup>nd</sup> order E-W lineaments. The E-W lineaments are most common in the central portion of Smøla, in Domains E, D, C (on the NW side), and A.

245 The NE-SW lineaments are typically 3<sup>rd</sup> order lineaments (Figure 2B.V). They form prominent elongate topographical valleys in the DTM of western Smøla. These lineaments dextrally offset both the N-S and NW-SE lineaments (including a 1<sup>st</sup> order lineament), and abut against the E-W, ENE-WSW, and WNW-ESE lineaments (as mentioned above). The NE-SW lineaments are, however, locally offset by possibly reactivated NW-SE, NNE-SSW, and NNW-SSE lineaments (with a possible dip-slip component), although these other lineaments frequently terminate against the NE-SW lineaments. Overall, the NE-SW  
250 lineaments are pervasive across Domains A, D, E, B, and F, but are nearly absent in Domain C.

The two least common lineament trends, the NNE-SSW and NNW-SSE lineaments, mutually crosscut one another, although this is mostly seen in the Domain F (Figure 2A). Similarly, apparent late reactivated NW-SE lineaments display similar mutual cross-cutting relationships. Overall, these lineaments either crosscut or abut against all other lineaments without being crosscut and offset by any other lineament (Figure 2B.VI). They are most abundant in Domain D and B for the NNE-SSW lineaments,  
255 and Domain F and E for the NNW-SSE lineaments.

## 4.2 Deformation history

The availability of four diamond drill holes (Figure 1B and Figure 3) confers a **novel** 3D view into the geology of Smøla and this portion of the Mid-Norwegian passive margin. As the ~365 m of drill core is oriented, centimetric-scale logging provided  
260 an **unprecedented** high-resolution structural dataset, which, together with extensive direct field observations (Figure 1b), represents the foundation of this study. The drill holes intersect several deformation zones and a large array of deformation features, which are displayed downhole on Figure 3. An assortment of minerals has been systematically documented as decorating fracture surfaces, mineralising faults rocks, and infilling veins (Figures 4 and 5). The different mineral infill types and associated deformation features exhibit either coeval or crosscutting relationships, and orientation trends (Figure 6). As  
265 such, assemblages of coeval infill minerals have been used to group the documented deformation features and mineralisation based on the relative timing (summarised in Figure 7). The coeval mineral assemblages, also corresponding to consistent deformation styles and orientation trends, may represent distinct mineralisation events associated with discrete deformation episodes (e.g., Drake et al., 2009; Viola et al., 2009). We now systematically describe the progressive mineralisation and deformation history of the study area starting from the apparent earliest to the latest features as informed by the relative age





270 relationships between the different mineral assemblages and deformation features. The local deformation history is here described as the summation of distinct deformation episodes (D's), each of which can be confidently characterised and distinguished from the others

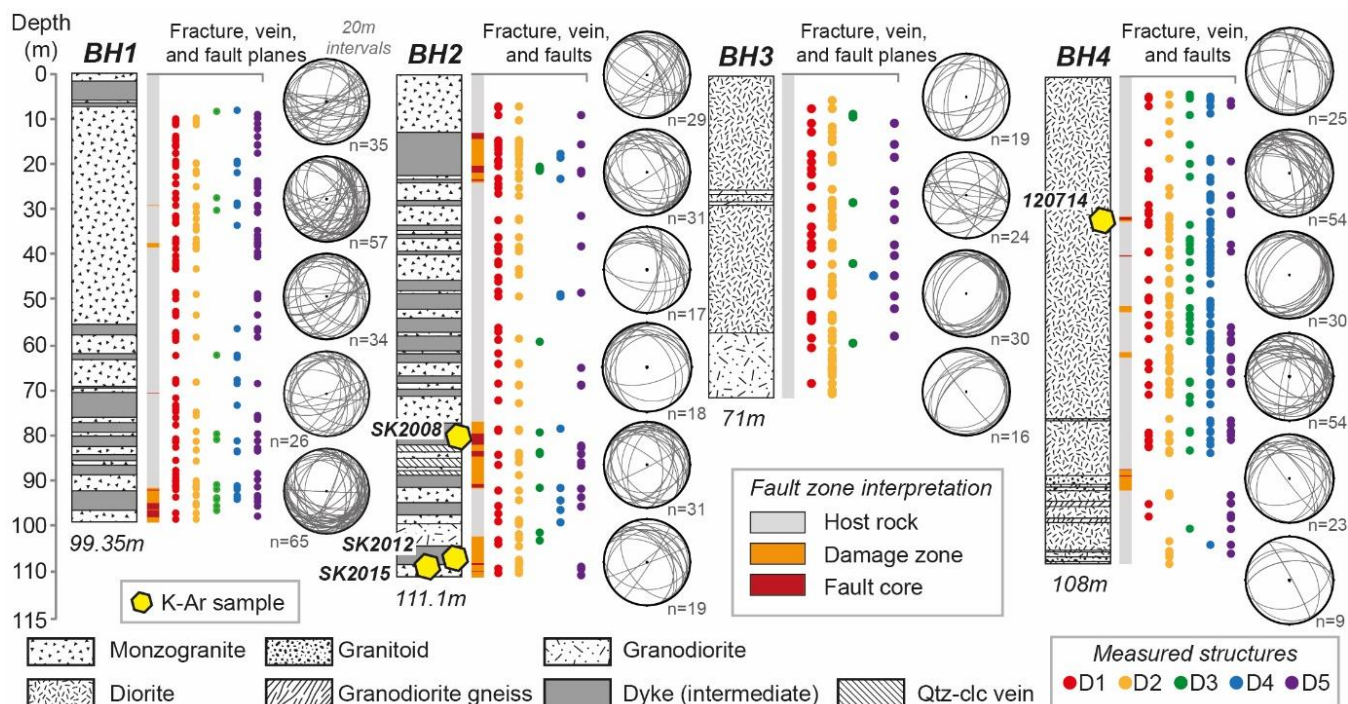

275 **Figure 3. Graphic logs showing both downhole lithology and fault zone interpretations for each of the four Smøla diamond drill holes. Measured structural data is shown distributed downhole, grouped by mineral assemblage (and deformation episode), with D1 = epidote-prehnite, D2 = sericite-chlorite-calcite, D3 = chlorite-hematite (+/- calcite), D4 = hematite-zeolite-calcite, and D5 = quartz-calcite. Measured structures are also represented plotted as planes on the adjacent equal area stereonet. Each stereonet represents at least 20m of drill core and correspond to the downhole depths of the drill holes.**

#### 4.2.1 D1: epidote-prehnite-stable faulting and veining

280 The earliest recognised brittle deformation features on Smøla are epidote and prehnite veins, hydraulic breccias, and cataclasites involving at least three different generations of epidote (epi 1, 2, and 3 on Figure 4A & B). These features are most commonly ENE-WSW striking, with other subordinate trends oriented WNW-ESE to NW-SE (Figure 6) and dip mostly steeply (~75°). They are strike- or oblique-slip features (commonly as top-to-the NNW normal-oblique faults).

285 The epidote mineralisation is either an early pale/light green-yellow (epi 1 and 2) or a later grass-green type (epi 3). The earlier epidote typically infills tensile or shear veins, with well-developed slickenside surfaces on the vein-host rock interfaces or internally on crack-seal surfaces (Figure 4A). The later grass-green epidote mineralisation, however, is different, occurring as infill of irregular, bifurcating to anatomising veins (Figure 4B), which in places crosscut and rework the early epidote. All three types cross-cut host rock lithological features, such as aplitic veins.





290

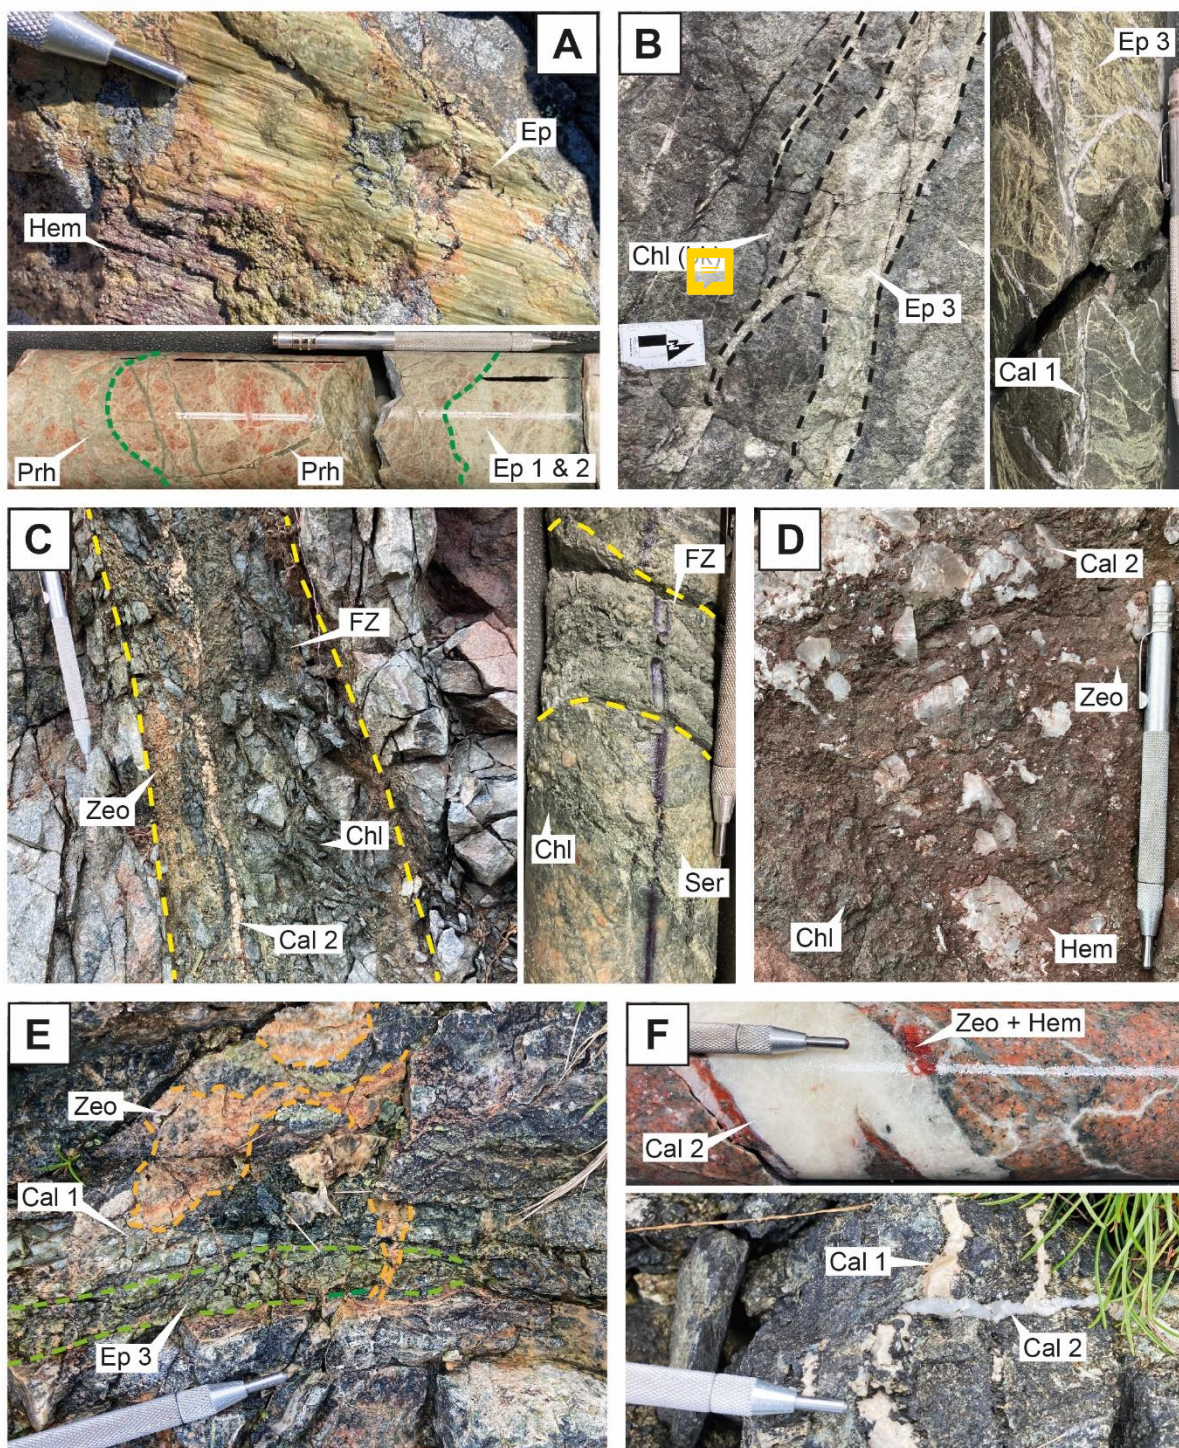





295 **Figure 4. Representative examples of mesoscale deformation features on Smøla. A) Epidote slickenside surface (combination of light green and grass-green epidote) and light green epidote (Ep 1 and 2) veins and cataclasite being cross-cut by prehnite (Prh) vein breccia in BH1. B) Bifurcating diffuse veins of grass-green epidote (epi 3) with black chlorite (Chl (bk)); core-hosted abundant grass-green epidote veins are cross-cut by early calcite veins (Cal 1). C) Chloritic (Chl) fault zone (+/- sericitic) with later zeolite (Zeo) and calcite vein (Cal 2). The zone is highly fractured, the friable gouge (left side of the zone) represents a fault core; a similar narrow fault zone in BH2, with strong foliation and abundant sericite (Ser) infill. D) Chlorite (Chl)-hematite (hem) cataclasite veneer on a fault surface with a later zeolite overprint and late quartz (Qtz)-calcite (Cal 2) infill. E) Zeolite (Zeo) veins cross-cutting early calcite (Cal 1) and epidote (Epi 3) veins. F) Deformed early calcite veins (pale brown coloured) (Cal 1) being cross-cut by translucent white late quartz-calcite vein (Cal 2). A-F) Scratch pen for scale = 13cm, B) Scale bar arrow = 10cm.**

Prehnite veins, significantly less abundant than epidote veins, occur in drill holes BH1 and BH2 together with epidote. Prehnite is commonly pale grey-green in colour, and infills veins, belonging to dense networks grading to proper dilatant hydraulic breccias (Figure 4A – drill core). In the case of the hydraulic breccias, included fragments are either host rock fragments of polycrystalline aggregates of quartz-feldspar or reworked epidote cataclasites/veins (in places with host rock fragments with included veins; Figure 5C).

The earlier epidote locally forms the matrix mineral of at least two generations of cataclasite to ultracataclasite, associated with discrete NE-SW to ENE-WSW-striking slip planes that dip from shallowly to sub-vertically (20°-85°). The earliest epidote cataclasite to ultracataclasite (epi 1) is typically only preserved as isolated fragments 1-5 mm in size and may have originally formed thin discrete pockets with a weak to distinct foliated to banded matrix dominated by very fine-grained epidote and clay (forming up to 75 %-90 % of the pockets). The included clasts are fine-grained (average size <60 µm), poorly sorted and subangular, and are typically mono to polycrystalline aggregates of quartz-feldspar host rock (Figure 5D). The second generation of epidote cataclasite (epi 2) occurs as localised zones (typically <10 cm in width), with a massive matrix (making up 60 %-70 % of the zones) formed by fine-grained epidote and clay (Figure 5A & B). The included fragments are very fine to coarse-grained (10 µm-6 mm), poorly sorted, angular to sub-angular, and polycrystalline fragments of host rock (quartz-feldspar) or reworked fragments of the earlier epidote ultracataclasite. The included epi 1 and host rock fragments within the epi 2 cataclasite exhibit minor offset and rotation from each other, suggesting that there was limited to no rigid-body rotation and mechanical comminution of the fragments.

320 Rarely, prehnite ultra-cataclasites occur as discrete zones 3-5 cm in width, striking NNW-SSE and NW-SE, and dipping shallowly to moderately (30°-65°), with the prehnite matrix forming >90 % of the zones. Overall, they are very fine-grained, with interspersed clay. The included clasts are fine-grained (<50 µm-1 mm), moderately sorted, subrounded to angular, and made up of mono to polycrystalline fragments of host rock and epidote cataclasite. The prehnite ultracataclasites are associated with the epidote cataclasites, with both the cataclasites mutually reworking one another.

#### 4.2.2 D<sub>2</sub>: repeated sericite-chlorite-calcite-stable faulting

D<sub>2</sub> sericite-chlorite-calcite shear features (Figure 4) invariably rework D<sub>1</sub> structures. They strike on average NE-SW or, subordinately, NW-SE, E-W, and NNE-SSW (Figure 6), and dip variably between ~35° and ~75°. These structures are

commonly strike- to oblique-slip faults, although thrusts and normal faults also occur, commonly associated with shallower features.

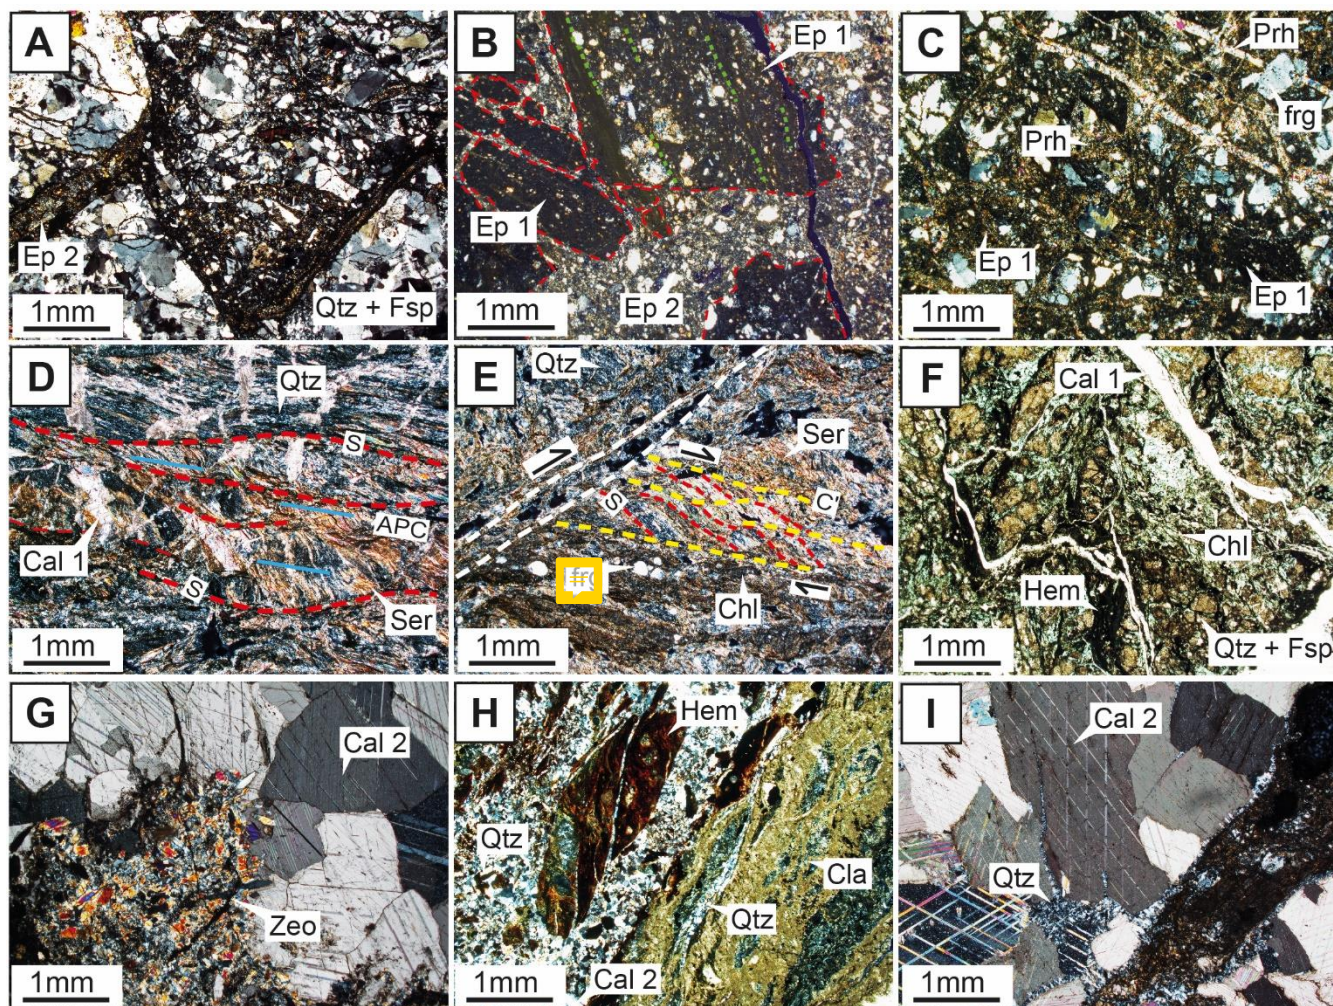

**Figure 5.** Photomicrographs outlining the progressive deformation episodes affecting Smøla over time. A) An Ep 2 vein and cataclasite reworking host rock monzogranite; B) Two generations of light green epidote cataclasites, an earlier ultracataclasite (Ep 1) fragments, almost isotropic, banded to foliated (yellow dashed lines highlighting the foliation), set within a later cataclasite (Ep 2). C) Prehnite (Prh) hydraulic breccia and veins reworking Ep 1 cataclasite/veins and host rock fragments. D) Asymmetric folds in a sericitic fabric, and early calcite veins. Associated with the folds, a rootless axial planar cleavage has formed (blue lines), along which a later foliation (red lines). E) Possible **ECC** fabric reworking the fabric since in D, forming in a sericite-chlorite shear zone. C'-planes (yellow lines), associated with chlorite, have formed inclined to a main shear surface (white line), and are reworking and back-rotating the cleavage-related foliation (from D), forming S-surfaces. Reworked host rock fragments are also present associated with the C'-planes, and chlorite. F) Chlorite-hematite breccia to gouge with deformed early calcite veins (Cal 1), and highly altered host rock minerals (feldspars). G) Zeolite-calcite (+/- interstitial hematite in the zeolite) vein, with the zeolite crystals subhedral to euhedral crystal faces within the calcite. Overall, the vein is relatively undeformed. H) Hematite indurated gouge reworked by a later quartz-calcite vein. Abundant clays are adjacent to the vein. I) Late quartz-calcite vein (Cal 2), exhibiting low deformation in the form of calcite twinning. All photomicrographs are 2.5x, XPL, except for F, which PPL.





345 These structures occur as single shear fractures or dense networks and some brittle-ductile shear zones. The well-developed deformation zones, with locally foliated gouge with highly fractured and disaggregating host rock clasts and early deformed calcite veins (Figure 4C), typically strike from NE-SW to E-W, and dip at either 15°-20° or sub-vertically. D2 structures, especially the well-developed deformation zones, are almost phyllitic at the microscale (Figure 5D & E), locally involving fine to medium-grained sericite/muscovite (30-40 %), chlorite (30 %), and clay (>5 %), with elongate domains of fine-grained  
350 recrystallised quartz (>20 %; the matrix forms ~80 % of the total volume). The host-rock clasts included within this groundmass are 20 µm-1 cm monocrystalline quartz fragments or polycrystalline aggregates of quartz and altered feldspar with subrounded shapes.

Microstructural relationships indicate at least two distinct deformation events: an early event with localised shearing along  
355 axial planar cleavages in an early folded sericite groundmass with calcite veins (Figure 5D); a subsequent event, which involved the reworking and rotation of the earlier axial planar cleavage shear planes (S-surfaces) by later C'-planes. This resulted in the development of an **extensional crenulation cleavage (ECC) -type fabric** (Figure 5E). These ECC zones also rework D1 epidote cataclasite and fragmented host rock. The host rock fragments locally form  $\sigma$  porphyroclasts with very fine-grained quartz in the strain shadows, and the sericite and chlorite groundmass (and very fine-grained clay) deflected around  
360 them.

#### 4.2.3 D<sub>3</sub>: chlorite-hematite-decorated fault rocks and shear fractures

The D<sub>3</sub> chlorite-hematite structures (Figure 4D), trend generally NE-SW with a subordinate NNE-SSW trend (Figure 6). The D<sub>3</sub> structures dip variably, although mostly steeply (~85°). Kinematically, most of the D<sub>3</sub> structures are either tensile features or shear fractures accommodating top-to-the ENE/WSW and NNW normal to oblique-normal faulting.  
365 Brown-red staining or 'dusting' of hematite and chlorite decorate and infill these structures. D<sub>3</sub> structures occur as individual anastomosing shear fractures, which locally have hematite slickensides, grading to networks, and breccias and gouges (and possible cataclasite or indurated gouge). The chlorite-hematite breccias to gouges are typically diffuse zones (up to ~3 m thick), with abundant D<sub>3</sub> fractures forming damage zones around them. The gouges are on average moderately to well consolidated features in hand specimen (Figure 4D).  
370 The breccia and gouge at the microscale are cemented by chlorite (40 %), hematite (30-50 %), and clay (10-20 %), with the matrix forming 5-20% of the overall zones (rarely up to 60 %; Figure 5F). The chlorite grains are either overprinting or have grown between the fragmented host rock (and host rock clasts), forming elongate grains in places. The hematite cement is dark red-brown to opaque in PPL, with the staining/ 'dusting' occurring as very fine-grained particles within fractures/matrix and overprinting the host rock. The host rock clasts themselves are typically medium to coarse-grained in size (2 mm-1 cm),  
375 moderately to poorly sorted, clast-supported, and comprised by altered quartz-feldspar (feldspar is partially altered to sericite) polycrystalline fragments. Elsewhere, the D<sub>3</sub> structures are associated with thin pockets of hematite-rich foliated to banded cataclasite/indurated gouge (<2 cm in thickness; Figure 5H), with a very fine-grained matrix (up to 80% of the zone) comprised

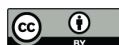

of hematite (80%), clay (15%), and chlorite (5%), with incorporated fine-grained (20-600  $\mu\text{m}$ ), poorly sorted and sub-rounded host rock clasts.

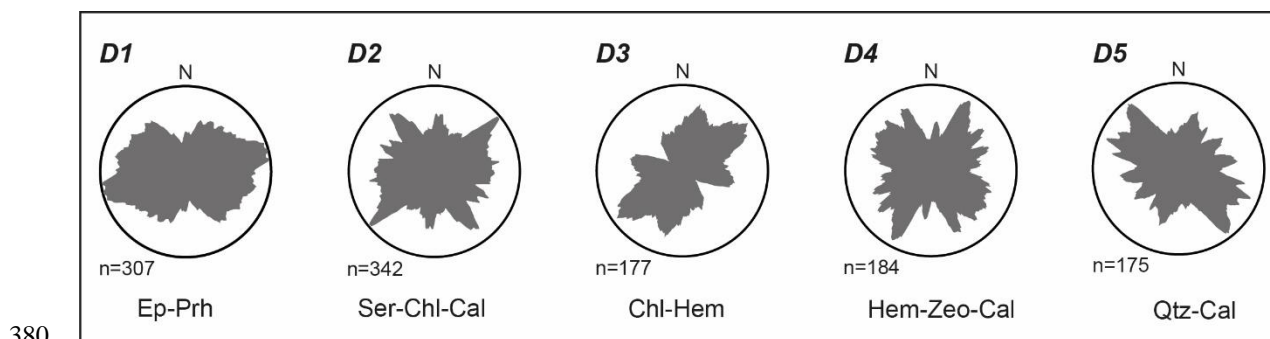

**Figure 6. Rose plots showing strike orientation trends (frequency) of deformation features in outcrop and drill core, sorted by deformation episode D1 to D5, associated with coeval mineral assemblages. Mineral types: Ep=epidote, Prh=prehnite, Ser=sericite, Chl=chlorite, Cal=calcite, Hem=hematite, Zeo=zeolite, Qtz=quartz**

#### 4.2.4 D4: hematite-zeolite-calcite veining

385 The D<sub>4</sub> hematite-zeolite-calcite structures (Figure 4E & F), which crosscut the earlier epidote, sericite-chlorite-calcite (clc 1) and chlorite-hematite structures, possess variable strike orientations. Most frequently are the NE-SW striking features, with subordinate more diffuse trends also discernible, involving NNW-SSE to WNW-ESE orientation trends (possibly forming orthogonally to the NE-SW trend) (Figure 6). The D<sub>4</sub> structures dip variably, but overall, mostly at  $\sim 70^\circ$  (although a significant portion dip at  $\sim 30^\circ$ ).

390

The D<sub>4</sub> hematite-zeolite-calcite structures are mostly tensile veins (0.1-6 mm in thickness), which are pervasive across Smøla (Figure 4E & F – drill core), with other more rare examples of hydraulic breccias and shear fractures with slickenside surfaces also present. Along with zeolite, the hematite component typically occurs as a bright-red type, different from the D<sub>3</sub>-related hematite, with a later less deformed type of calcite (clc 2) (Figure 7). In outcrop and in drill core, D<sub>4</sub> structures most commonly occur as coarse-grained ‘sugary’ masses of zeolite-calcite, locally mineralising over pre-existing veins of epidote or chlorite-hematite (Figure 4E).

395

At the microscale, the D<sub>4</sub> veins are comprised by zeolite (laumontite) occurring as fine to medium-grained decussate subhedral prismatic crystals, in places with interstitial Fe staining. In the places where zeolite crystals have intergrown with late calcite, they form bounding comb-type textures with euhedral crystal morphologies (Figure 5G). Additionally, radial masses of zeolite occur as grain boundary growths within the calcite portions of the veins, indicating the coeval mineralisation of both minerals. The zeolite, hematite, and late calcite (clc 2) components in these veins show little to no significant post-crystallisation deformation implying the D<sub>4</sub> veins are indeed relatively late.

400

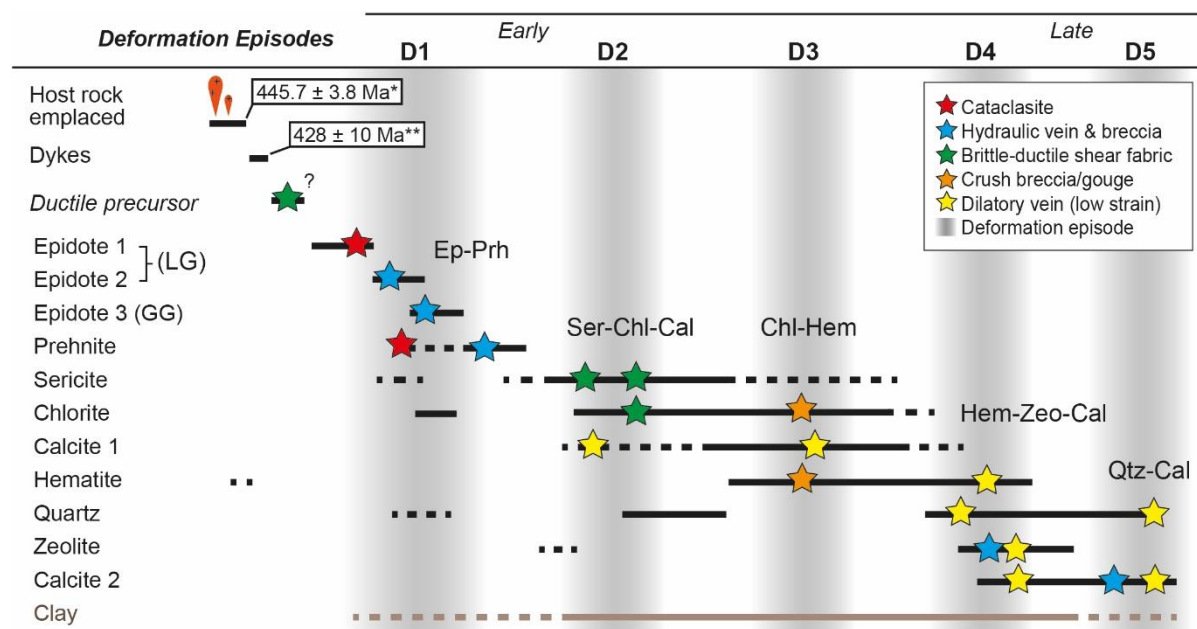

405 **Figure 7. Chronological table of showing relative mineralisation times of different mineral coating types, key deformation features**  
**associated with each mineral type is shown in relative chronology, with clustering of mineralisation and deformation features**  
**grouped into five main deformation episodes. Duration of possible authigenic clay mineralisation is also shown relative to the other**  
**mineral phases. These episodes are associated with specific mineral assemblages. Mineral types: Ep=epidote, Prh=prehnite,**  
**Ser=sericite, Chl=chlorite, Cal=calcite, Hem=hematite, Zeo=zeolite, Qtz=quartz. \*Host rock age provided by (Tucker et al., 2004);**  
 410 **\*\*Age of dyke emplacement by Gautneb (1988).**

#### 4.2.5 D<sub>5</sub>: quartz-calcite veining

The D<sub>5</sub> quartz-calcite veins, involving the late calcite variety (Cal 2) and mineralised quartz, rework and offset all other deformation features (D<sub>1</sub> to D<sub>4</sub>) (Figure 7). These features are most frequently NW-SE striking, with subordinate trends oriented WNW-ESE and NNE-SSW (Figure 6). Overall, these veins have moderate dips (~30°-70°) on average. Most of these  
 415 features are either tensile veins or extensional features with normal slip-sense.

The D<sub>5</sub> quartz-calcite veins, in outcrop or intersected in drill core, are translucent to opaque white, exhibit crack-seal layering parallel to the vein-host boundary and are planar to bifurcating features (Figure 4F). The veins occur as singular narrow to wide veins (0.1 mm-22 cm) or as complex vein networks, and in places, hydraulic breccias with included angular fragments  
 420 of the host rock. Commonly, these late veins are within and subparallel to existing deformation features, such as sericite-chlorite deformation zones, and may represent a later tensile reactivation of these features (the earlier features being mechanically weak planes within the host rock volume) (Figure 4D). The late quartz-calcite veins crosscut the earlier calcite veins (clc 1; Figure 4F), which are less quartz-rich, relatively massive, more opaque white and possess deformed non-planar morphologies to disaggregated irregular domains (for example in D<sub>2</sub>).

425





At the micro-scale, the D<sub>5</sub> veins contain medium to coarse-grained calcite crystals, typically anhedral, exhibiting distinct cleavage, with fine-grained quartz grain rims along the borders or between the calcite grains (Figure 5I). In places, the quartz is coarser-grained, forming comb-type textures with euhedral crystal terminations into the larger calcite crystals. Commonly, quartz and calcite also mineralise as alternating bands parallel to the vein border, indicating multiple crack-seal mineralisations.

430 Although these veins are not significantly deformed after mineralisation, similarly as D<sub>4</sub>, the calcite in the veins is twinned, suggesting the veins have experienced later strain.

Two zones do not correlate over the drill holes: in BH1 an NNE-SSW striking, moderately SE-dipping zone involving D<sub>2</sub> chloritic and sericite cataclasite and gouge with a massive late quartz-calcite vein; and in BH2, an ENE-WSW striking, 435 shallowly S-dipping zone (90.58 m-91.37 m) made up of a D<sub>3</sub> chlorite-hematite breccia to gouge with an associated alteration zone.

Where possible, these different intersected zones in BH1 and BH2 could therefore be linked by modelled tabular 3D volumes representative of structures, as shown in [Figure 10A](#) (with downhole zones labelled Zone 1 to 4). The structures are modelled 440 through a volume set around the two drill holes (150 x 225 x 260 m in size), which being a local representation, is not large enough to characterise Smøla. The zones crosscut each other, without significant offsets (assumed to be negligible for this modelling exercise), with the zones typically between 1 m to 6 m in true thickness, with some dip and thickness variation (pinch and swell) through the modelling volume based on the drill hole intersections (N-S and E-W sections in Figure 10A). The zones indicate various orientation trends, with the D<sub>2</sub>-related volumes being moderately south to SE-dipping, while the 445 D<sub>3</sub>-related are relatively shallowly-dipping zones.

To explore the multiscale nature of the Smøla deformation features, 3D models of selected intervals of D<sub>5</sub> quartz-calcite veins in BH2 (14.6 m x 14 m x 19 m in size), and epidote-prehnite (D<sub>1</sub>) veins in BH1 (2.3 m x 2.2 m x 2.3 m in size) were also produced utilising the available structural data for the afore mentioned features (Figure 10B). These models, including Figure 450 10A, display the 3D network characteristics of brittle deformation features, with either subparallel or inclined structures forming systematic to semi-systematic arrays of structures. From the drill data, the different structures occur at different scales: the D<sub>2</sub>, D<sub>3</sub>-related structural zones can be modelled at the hundred(s) of metres-scale (Figure 10A), to the tens of metres-scale for the D<sub>4</sub>, D<sub>5</sub> veins (Figure 10B), and metres to sub-metre scale for the D<sub>1</sub> structures (Figure 10B). In addition, the structures associated to the various deformation episodes have, on average, different aperture widths and potential strike extents. The D<sub>2</sub> 455 structures have the largest aperture and strike extents, while the D<sub>1</sub> features possess the least structural continuity on average.

Overall, the modelling results provide powerful multiscale visualisations of the complex structural network arrays that the different deformation features form in 3D space, sorted by deformation episode. As these network geometries are not always appreciable in either outcrop or as drill hole intersections, the various characteristics are instead more apparent once they are



460 modelled. Although the modelling volumes are limited in size (at all scales), the geometries and morphologies of the different  
modelled features are representative for rock volumes around the BH1 and BH2 drill holes at least and define geometries that  
can easily be up-scaled, also confirming relative crosscutting relationships.

### 4.3 K-Ar geochronology and X-ray diffraction

465 Seven fault gouge samples were collected from drill holes BH2 (SK2008, SK2012, SK2015) and BH4 (120714), and fault core  
exposures at different outcrops on Smøla Island (SK1024\_1, SK1029\_1, SK1033\_1; Table 2 & Figure 8) for dating of  
authigenic and synkinematic K-bearing clays.

**Table 2. Summary of K-Ar samples collected from either drill holes BH2 and BH4, or field stations on Smøla Island.**

| Sample   | Site/BH | Host rock                       | Orientation<br>(dip/dip direction) | Deformation<br>episode          | Description                                                                                                         |
|----------|---------|---------------------------------|------------------------------------|---------------------------------|---------------------------------------------------------------------------------------------------------------------|
| SK2008   | BH2     | Monzogranite,<br>fault rock     | 10/285                             | D <sub>3</sub>                  | Hydraulic breccia to crackle breccia and<br>hematite-bearing shear veins.                                           |
| SK2012   | BH2     | Monzogranite,<br>fault rock     | 15/320                             | D <sub>2</sub>                  | Shear foliation within sheared and foliated<br>gouge band.                                                          |
| SK2015   | BH2     | Monzogranite,<br>sheared mafic? | 37/183                             | D <sub>2</sub>                  | Well milled gouge, some residual veins, and<br>lithic fragments present (possibly from bound-<br>ing monzogranite). |
| 120714   | BH4     | Diorite,<br>clays               | 54/059                             | D <sub>3</sub> , D <sub>4</sub> | Friable gouge in shear band, clay rich, with<br>zeolite veins.                                                      |
| SK1024_1 | 1024    | Diorite,<br>fault gouge         | 73/179                             | D <sub>2</sub>                  | Sample from upper portion of exposed sub-<br>vertical structure; well developed gouge.                              |
| SK1029_1 | 1029    | Monzodiorite,<br>fault gouge    | 80/166                             | D <sub>2</sub>                  | Gouge sample, green, chloritic, structure<br>parallel to major E-W structure.                                       |
| SK1033_1 | 1033    | Gabbro                          | 80/155?                            | D <sub>3</sub>                  | Possible fault gouge within saprolite zone.                                                                         |

470 The different samples are characterised by comparatively different weight percents (wt%) for potassium (K on Table 3), with  
the value relating to the amount of potassium-bearing minerals (such as illite, muscovite, or potassic feldspar) in the analysed  
material. Samples SK2012 and SK2015 possess the highest weight percents, while 120714, SK1024\_1 and SK1033 the lowest  
weight percents. The samples also reported variable radiogenic <sup>40</sup>Ar percents, with samples 120714, SK1033\_1 and SK1024\_1  
reporting the lowest percents.

475

The samples yielded ages between  $74.7 \pm 1.7$  Ma and  $314.9 \pm 5.4$  Ma (Figure 9A & Table 3), with results commonly following  
an age spectrum curve with the oldest ages corresponding to the coarsest size fractions and the lowest ages corresponding to  
the finest size fractions. Sample SK1029\_1, however, does not follow this trend, with the oldest age corresponding to the size  
fraction 0.4-2  $\mu$ m. This is possibly owing to the amount of zeolite within the 0.4-2  $\mu$ m (13 wt%), 2-6  $\mu$ m (21 wt%), and 6-10

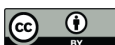

480  $\mu\text{m}$  (25 wt%) size fractions (Table 4), with radiogenic  $^{40}\text{Ar}$  loss from the zeolite crystal structure, and therefore lower age results. As the coarser size fractions may involve ‘mixed’ results of both authigenic and protolithic K-Ar signals (Viola et al., 2016), the ages associated with the finest size fractions are considered the most reliable as they potentially record the last deformation episode archived in the dated fault rock.

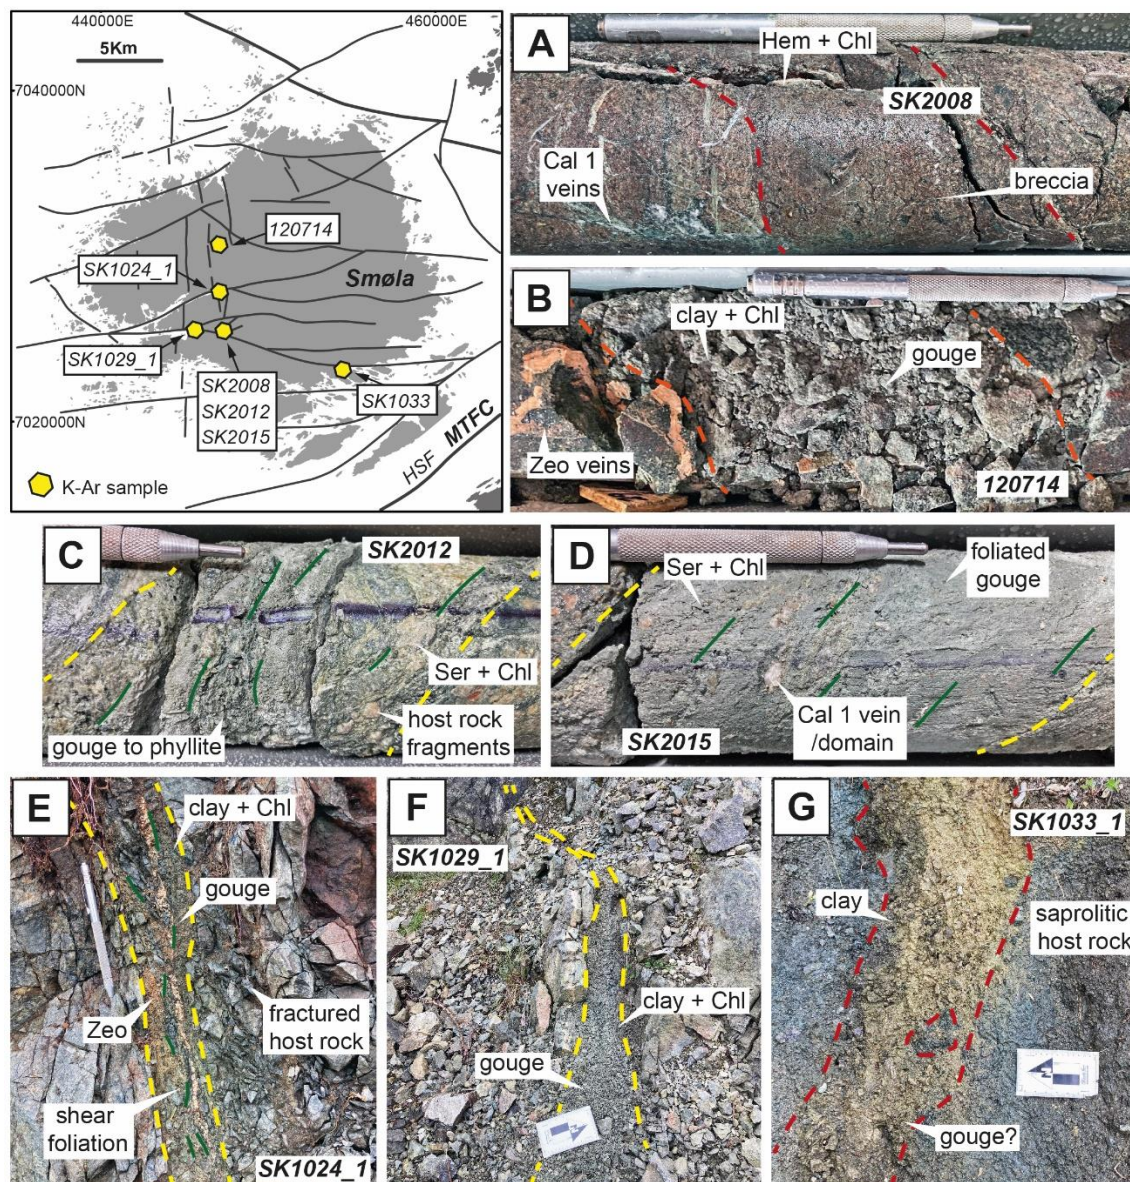

485 **Figure 8.** The locations on Smøla Island of the collected K-Ar samples relative to mapped lineaments, and A-G) K-Ar sample sites, with samples SK2008, SK2012, and SK2015, 120714 collected from diamond drill core, and samples SK2024\_1, SK1029\_1, and SK1033\_1 collected from field locations. Scratch pen for scale = 13cm, or scale bar arrow = 10cm.





**Table 3. K-Ar analysis age data results of the Smøla samples by size fraction.**

|          | Sample        |           | 40Ar*     |       |         | K         |      |       | Age Data |        |
|----------|---------------|-----------|-----------|-------|---------|-----------|------|-------|----------|--------|
|          | Fraction (µm) | Mass (mg) | mol/g     | σ (%) | 40Ar* % | Mass (mg) | wt % | σ (%) | Age (Ma) | σ (Ma) |
| SK2008   | <0.1          | 2.088     | 2.894E-10 | 0.57  | 40.4    | 50.6      | 1.63 | 1.76  | 99.6     | 1.8    |
|          | 0.1-0.4       | 2.036     | 3.821E-10 | 0.54  | 53.9    | 51.6      | 1.46 | 1.78  | 144.9    | 2.6    |
|          | 0.4-2         | 2.096     | 6.728E-10 | 0.50  | 77.2    | 52.8      | 1.79 | 1.74  | 204.7    | 3.5    |
|          | 2-6           | 3.604     | 1.161E-09 | 0.46  | 89.6    | 52.2      | 3.06 | 1.64  | 206.5    | 3.3    |
|          | 6-10          | 2.672     | 1.376E-09 | 0.47  | 94.7    | 51.0      | 3.85 | 1.58  | 195.2    | 3.1    |
| SK2012   | <0.1          | 2.016     | 2.065E-09 | 0.49  | 90.3    | 51.0      | 5.75 | 1.43  | 196.1    | 2.8    |
|          | 0.1-0.4       | 3.654     | 2.221E-09 | 0.46  | 92.4    | 52.0      | 5.46 | 1.44  | 220.5    | 3.1    |
|          | 0.4-2         | 2.938     | 2.716E-09 | 0.46  | 95.6    | 52.8      | 5.40 | 1.44  | 268.9    | 3.8    |
|          | 2-6           | 2.524     | 2.536E-09 | 0.47  | 98.3    | 50.9      | 4.50 | 1.53  | 298.8    | 4.4    |
|          | 6-10          | 2.452     | 2.106E-09 | 0.47  | 98.6    | 50.9      | 3.85 | 1.58  | 290.7    | 4.4    |
| SK2015   | <0.1          | 2.596     | 2.036E-09 | 0.47  | 90.4    | 51.5      | 5.51 | 1.44  | 201.4    | 2.9    |
|          | 0.1-0.4       | 3.048     | 2.202E-09 | 0.46  | 93.1    | 51.3      | 5.33 | 1.46  | 223.7    | 3.2    |
|          | 0.4-2         | 3.122     | 2.522E-09 | 0.46  | 95.5    | 51.6      | 5.16 | 1.47  | 261.8    | 3.8    |
|          | 2-6           | 3.612     | 1.832E-09 | 0.46  | 97.0    | 51.1      | 3.37 | 1.62  | 289.1    | 4.5    |
|          | 6-10          | 2.466     | 1.370E-09 | 0.47  | 98.4    | 50.9      | 2.54 | 1.69  | 287.0    | 4.7    |
| 120714   | <0.1          | 2.750     | 5.869E-11 | 1.24  | 8.2     | 50.7      | 0.44 | 1.91  | 74.7     | 1.7    |
|          | 0.1-0.4       | 1.368     | 1.122E-10 | 1.26  | 14.5    | 50.7      | 0.58 | 1.90  | 109.0    | 2.4    |
|          | 0.4-2         | 3.600     | 1.844E-10 | 0.47  | 28.8    | 50.8      | 0.77 | 1.88  | 132.6    | 2.5    |
|          | 2-6           | 2.710     | 2.786E-10 | 0.45  | 51.6    | 50.1      | 1.11 | 1.85  | 138.8    | 2.5    |
|          | 6-10          | 2.554     | 3.933E-10 | 0.42  | 51.0    | 52.6      | 1.41 | 1.82  | 153.6    | 2.7    |
| SK1024_1 | 0.1-0.4       | 2.220     | 1.982E-10 | 0.58  | 42.3    | 50.5      | 0.67 | 1.92  | 162.1    | 3.1    |
|          | 0.4-2         | 1.600     | 3.118E-10 | 0.59  | 31.1    | 50.4      | 0.95 | 1.89  | 180.5    | 3.4    |
|          | 2-6           | 2.568     | 3.196E-10 | 0.45  | 42.9    | 52.6      | 1.00 | 1.88  | 176.1    | 3.2    |
|          | 6-10          | 3.186     | 2.926E-10 | 0.42  | 53.2    | 54.6      | 0.99 | 1.88  | 163.5    | 3.0    |
| SK1029_1 | <0.1          | 2.618     | 5.023E-10 | 0.41  | 50.4    | 51.3      | 1.34 | 1.85  | 204.1    | 3.7    |
|          | 0.1-0.4       | 3.728     | 5.895E-10 | 0.38  | 57.3    | 57.2      | 1.18 | 1.85  | 267.3    | 4.7    |
|          | 0.4-2         | 3.136     | 9.189E-10 | 0.38  | 77.4    | 56.0      | 1.54 | 1.82  | 314.9    | 5.4    |
|          | 2-6           | 2.582     | 8.275E-10 | 0.39  | 84.9    | 62.8      | 1.92 | 1.76  | 232.8    | 3.9    |
|          | 6-10          | 1.636     | 8.246E-10 | 0.45  | 88.3    | 52.5      | 2.05 | 1.78  | 218.2    | 3.8    |
| SK1033_1 | <0.1          | 2.224     | 1.814E-11 | 9.36  | 0.8     | 51.7      | 0.08 | 1.97  | 128.1    | 11.8   |
|          | 0.1-0.4       | 2.236     | 2.085E-11 | 7.31  | 0.9     | 51.4      | 0.09 | 1.97  | 126.0    | 9.2    |
|          | 0.4-2         | 2.854     | 9.294E-11 | 1.33  | 5.0     | 53.2      | 0.21 | 1.96  | 234.5    | 5.2    |
|          | 2-6           | 3.042     | 1.020E-10 | 0.91  | 9.0     | 60.3      | 0.22 | 1.95  | 247.2    | 5.0    |
|          | 6-10          | 2.354     | 1.219E-10 | 0.98  | 8.6     | 54.5      | 0.25 | 1.95  | 263.3    | 5.4    |

Samples SK2012 and SK2015 yielded very similar ages for all size fractions even though the sampled fault structures are differently oriented, with SK2012 striking NE-SW (15/320) and SK2015 striking E-W (37/183). Samples 120714, SK2008, and SK1033\_1 provided the youngest ages ( $74.7 \pm 1.7$  Ma,  $99.6 \pm 1.8$  Ma, and  $128.1 \pm 11.8$  Ma respectively) for the finer fractions (<0.1 µm and 0.1-0.4 µm), with the remaining samples (except for SK1024\_1) returning an age around 200 Ma for



495 the finest fraction. Overall, the results show size fraction age clustering, particularly the finest and coarsest fractions, around ~100 Ma, 200 Ma, and 300 Ma (Figure 9A).

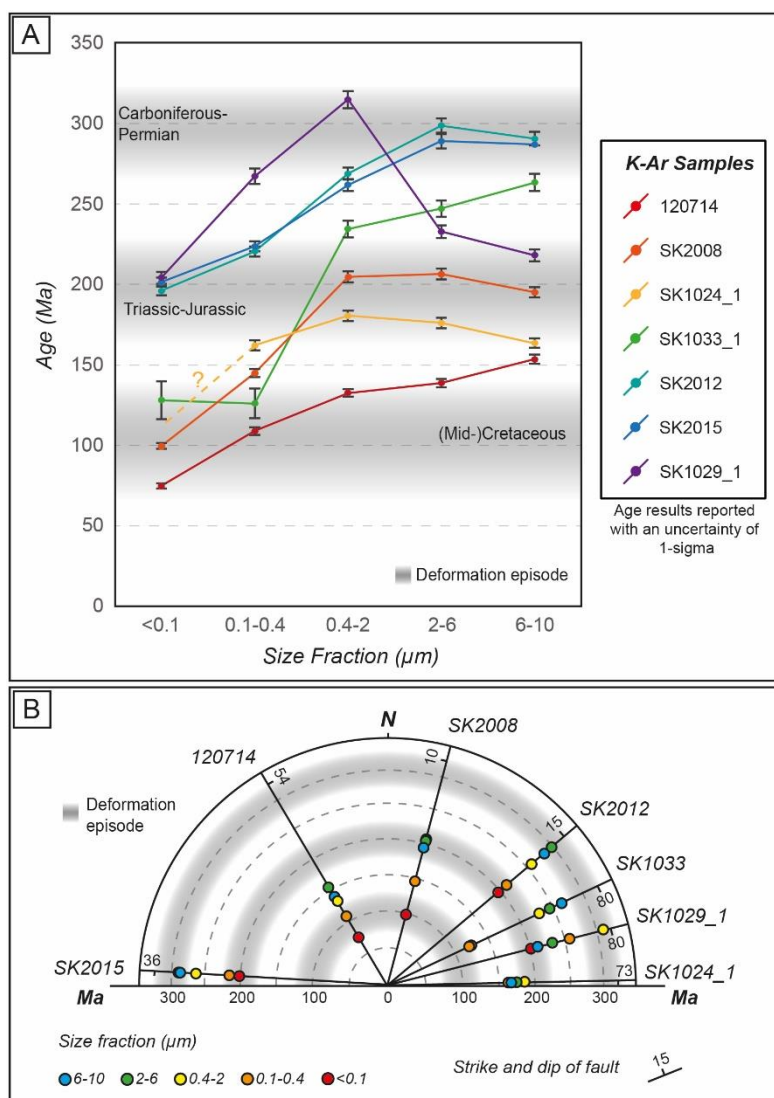

500 **Figure 9. A) K-Ar age spectra results for the seven samples. Data is expressed by size fraction of the sampled medium against determined age, with age clustering indicating possible authigenic (and deformation) episodes; B) Radial plot showing dated samples with K-Ar ages and size fraction (coloured circles) plotted on lines indicating the orientations of sampled structures.**

Plotting age results by size fraction and structure orientation (Figure 9B), one can appreciate that the NNE-SSW and ENE-WSW samples both yielded the youngest ages in the Late Triassic-Early Jurassic to Mid-Cretaceous (~200 Ma – 100 Ma), while the NE-SW and WNW-ESE oriented structures yielded ages between the Late Carboniferous and Late Triassic/Early





505 Jurassic (~300 Ma – 200 Ma). The oldest ages from the coarsest fractions are both associated from fault rocks from NE-SW and ENE-WSW structures.

**Table 4. X-ray diffraction results for the K-Ar samples. Mineral abbreviations: Qtz = quartz, Ksp = Potassic feldspar, Plg = plagioclase, Ill/mus = illite/muscovite, Chl = chlorite, Smc = smectite, Hem = hematite, Cal = calcite, Zeo = zeolite, Amp=amphibole.**  
 510 **Note that due to very poor crystallinity and/or the lack of structural data for mixed-layer clay minerals, only semi-quantitative assessments could be made. Wt % amounts are represented by x=<5, xx = 5-15, xxx = 15-30, xxxx = >30. NEM = Note enough material.**

| Sample   | Fraction (µm) | Qtz   | Ksp | Plg    | Ill/mus | Chl   | Smc  | Chl/chl-smc | Hem | Cal   | Zeo   | Amph   | Other |
|----------|---------------|-------|-----|--------|---------|-------|------|-------------|-----|-------|-------|--------|-------|
| SK2008   | <0.1          |       |     |        | Trace   | xx    | xxxx |             |     |       |       |        |       |
|          | 0.1-0.4       |       |     |        | xxx     | xxx   | xxxx |             | x   |       |       |        |       |
|          | 0.4-2         | x     |     |        | xxx     | xxxx  | xxxx |             | x   |       |       |        |       |
|          | 2-6           | xx    | xx  |        | xxx     | xxx   | xxx  |             | x   | x     |       |        |       |
|          | 6-10          | xx    | xx  |        | xxx     | xxx   | xxx  |             | x   | x     |       |        |       |
| SK2012   | <0.1          |       |     |        | xxxx    | xxx   | xx   |             |     |       |       |        |       |
|          | 0.1-0.4       |       |     |        | xxxx    | xxxx  | xx   |             |     |       |       |        |       |
|          | 0.4-2         | x     |     |        | xxxx    | xxxx  | xx   |             |     |       |       |        |       |
|          | 2-6           | xxx   |     |        | xxxx    | xxx   | x    |             |     |       |       |        |       |
|          | 6-10          | xxxx  |     |        | xxxx    | xxx   | x    |             |     |       |       |        |       |
| SK2015   | <0.1          |       |     |        | xxxx    | xxx   | xx   |             |     |       |       |        |       |
|          | 0.1-0.4       |       |     |        | xxxx    | xxxx  | xx   |             |     |       |       |        |       |
|          | 0.4-2         | x     |     |        | xxxx    | xxxx  | xx   |             |     |       |       |        |       |
|          | 2-6           | xxxx  | x   |        | xxx     | xxx   | xx   |             |     | Trace |       |        | x?    |
|          | 6-10          | xxxx  | x   |        | xxx     | xx    | x    |             |     | Trace |       |        | x?    |
| 120714   | <0.1 *        |       |     |        |         |       | xxxx |             |     |       |       |        |       |
|          | 0.1-0.4       |       |     |        | Trace   | x     | xxxx |             |     |       |       |        |       |
|          | 0.4-2         |       |     |        |         | xx    | xxxx |             |     | Trace |       |        |       |
|          | 2-6           |       | x   | x      | x       | xxx   | xxxx |             |     | Trace |       |        |       |
|          | 6-10          |       | x   | x      | xx      | xxx   | xxxx |             |     | Trace |       |        |       |
| SK1024_1 | <0.1          | NEM   |     |        |         |       |      |             |     |       |       |        |       |
|          | 0.1-0.4 *     | x     |     |        | Trace?  | xxxx  | xxxx |             |     |       | Trace |        |       |
|          | 0.4-2         | xx    |     |        | Trace   | xxxx  | xxxx |             |     |       | xx    |        |       |
|          | 2-6           | xx    |     |        | Trace   | xxxx  | xxx  |             |     |       | xxx   |        |       |
|          | 6-10          | xx    |     |        | Trace?  | xxxx  | xxx  |             |     |       | xxx   |        |       |
| SK1029_1 | <0.1          |       |     |        |         |       |      | xxxx        |     |       |       |        |       |
|          | 0.1-0.4       |       |     |        | xx      |       |      | xxxx        |     |       | Trace |        |       |
|          | 0.4-2         | Trace |     | Trace? | xx      |       |      | xxxx        |     |       | xx    | Trace? |       |
|          | 2-6           | x     |     | Trace  | xx      |       |      | xxxx        |     |       | xxx   | Trace  |       |
|          | 6-10          | x     |     | Trace  | xx      |       |      | xxxx        |     |       | xxx   | Trace  |       |
| SK1033_1 | <0.1          |       |     |        |         |       | xxxx |             |     |       |       |        |       |
|          | 0.1-0.4       |       |     |        |         |       | xxxx |             |     |       |       |        |       |
|          | 0.4-2         |       |     |        |         | Trace | xxxx |             |     |       |       |        |       |
|          | 2-6           |       |     |        |         | Trace | xxxx |             |     |       |       |        |       |
|          | 6-10          |       |     |        | Trace   | Trace | xxxx |             |     |       |       |        |       |

As shown in Figure 8, and documented by the X-ray diffraction (XRD) results in Table 4, the sampled faults have variable  
 515 rock textures and compositions: Sample SK2008 (Figure 8A), involves a chlorite-hematite-rich breccia, with significant



amounts of smectite and illite, mostly responsible for the potassic content. Potassic-feldspar content, potentially derived from the host rock, is restricted to the coarser size fractions (2-6  $\mu\text{m}$  and 6-10  $\mu\text{m}$ ), limiting the possibility of contamination in the finest size fraction. Both samples SK2012 and SK2015 (Figure 8C & D), being phyllitic to foliated gouge intervals dominated by illite/muscovite (sericite), chlorite, and lesser amounts of smectite, with SK2015 possessing very low amounts of potassic-feldspar in the coarser size fractions (derived from the host rock). Overall, the two samples are structurally and mineralogically similar. Samples 120714 (Figure 8B), and SK1024\_1 (Figure 8E) are mostly chlorite and smectite, with traces of illite/muscovite(sericite). However, the presence of zeolite veins within these zones (for 120714 not detected in the XRD results) in the drill core and field, is noteworthy. The sample SK1024\_1 lacked enough finest fraction ( $<0.1 \mu\text{m}$ ) material to be K-Ar analysed, and therefore is only included for demonstrative purposes. SK1029\_1 (Figure 8F) is similar to both SK2012 and SK2015, with a composition dominated by sericite and chlorite/smectite. The presence of zeolite, as mentioned before, has influenced the age reporting in the coarser fractions. SK1033\_1 (Figure 8G), which is a possible weathered gouge within a saprolite horizon, bound by chloritic slickenside surfaces adjacent to the zone, is dominated by smectite, with only trace amounts of both illite/muscovite and chlorite. The colouration and mineral compositions suggest that this potential structure may be similar to either samples SK2008 (apparently lacking hematite) or SK2012/SK2015.

#### 530 **4.4 Basement deformation in 3D**

Outcrops typically offer a 2D view of the deformation features and internal structure of a given rock volume. Utilising the four oriented drill holes (Figure 3, with locations on Figure 1B) we can additionally provide a 3D view of the Smøla geology. Using the Leapfrog Works (Seequent, 2022) 3D modelling software, logged downhole intersections of relevant deformation features and selected orientation data, explicit hanging wall and footwall boundaries were defined within selected rock volumes. Implicit 3D volumes were thus generated constraining the true thickness and orientation of the relevant structures. In the case of BH1 and BH2, modelled structures that extend through more than one drill hole provide insights into the strike continuity and extent of these deformation zones, and the potential fracture connectivity within the Smøla rock volume. Therefore, 3D modelling of drill hole data is a valuable tool in furthering our understanding of rock volume characteristics. Furthermore, as we can incorporate both relative (deformation episodes outlined above, in Figure 7) and absolute deformation ages (also see above), the modelling also includes the temporal dimension.

As drill holes BH1 and BH2 are proximal together, features can be successfully matched between them, and modelled. These drill holes intersected deformation zones, highly fluid-altered and veined intervals, and shear zones/fault cores (Figure 3). Considering the geological and deformation characteristics of each of these zones, particularly the fault core intersections (assumed to have the greatest strike continuity) and the associated damage zones, we can interpret correlations between these different zones. These correlations are also guided by the orientations of bounding deformation features around the fault cores (such as shear fractures) helping to resolve the complete geometries of these zones.

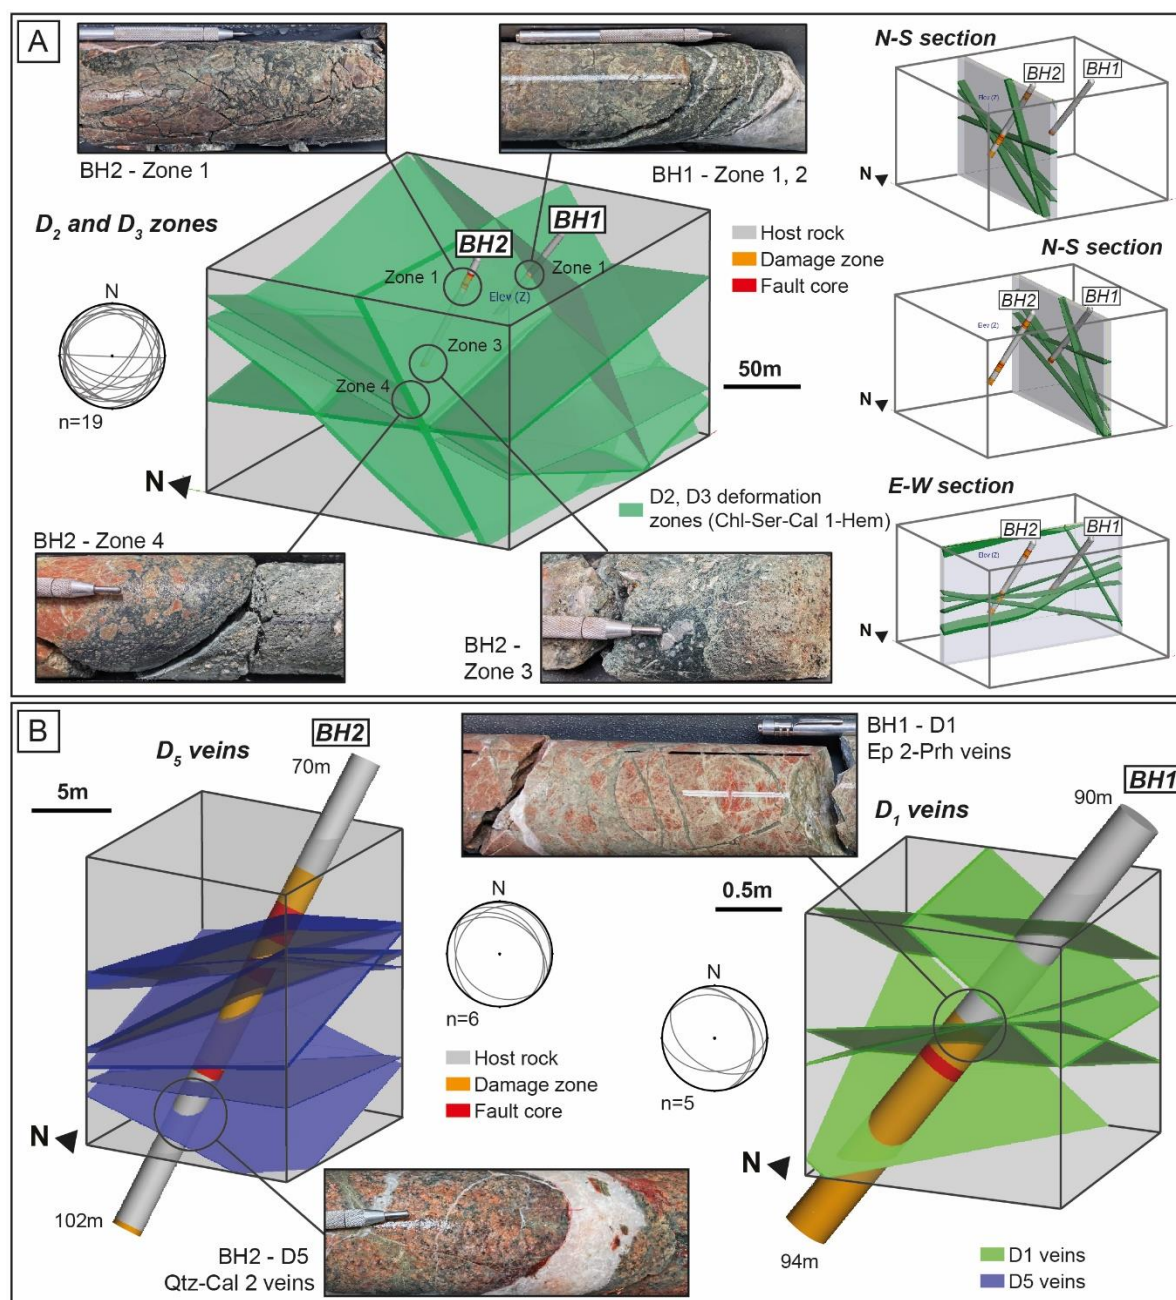

550

555

**Figure 10.** A) 3D model of major intersected brittle structures (green planar volumes) in drill holes BH1 and BH2. Modelling completed in Leapfrog using bounding deformation features, such as shear fractures (plotted in included stereonet). Zones 1 to 4 are representative of the D3-D4 deformation zones present in one or both the drill holes, descriptions include in the text. N-S and E-W cross sections included on the right of the figure, with the N-S sections taken through each drill hole. B) 3D models at different scales to A, with both quartz-calcite (D5) and epidote-prehnite (D1) modelled from drill core structures (included in associated stereonet plots).



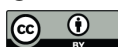

Accordingly, between BH1 and BH2 there are at least four correlated zones (Figure 10A): I) In BH1, a shallow E-W, moderately south-dipping zone (37.46 m-37.81 m) that is similarly intersected in BH2 (12.94 m-23.59 m), characterised by an early D<sub>1</sub> epidote veins and hydraulic breccia (epi 2) which is cross-cut and reworked by a D<sub>2</sub> chloritic/sericitic breccia, discrete fractures, and D<sub>5</sub> quartz-calcite veins (clc1 and clc 2); II) a zone in BH1 (70.6 m-70.77 m), striking NE-SW and NW-dipping (relatively flat-lying) which widens in BH2 (79.39 m-81.78 m) involving abundant early D<sub>1</sub> epidote veins, and cross-cutting chlorite, hematite (stronger hematite mineralisation in BH2) D<sub>3</sub> breccia to cataclasite with deformed calcite veins (clc 1); III) a lower zone in BH1 (92.03 m-96.33 m) striking NE-SW, and shallowly-dipping, also present in BH2 (83.33 m-84.51 m), characterised by D<sub>1</sub> epidote cataclasite that has been reworked by deformation associated with chlorite and zeolite (zeolite is in places limited to the host rock fragments); these cataclasites and breccias are cross-cut by D<sub>4</sub> zeolite-calcite and abundant late D<sub>5</sub> quartz-calcite veins locally forming a dense vein network; and IV) a moderately to shallowly SW-dipping zone, mostly intersected in BH2 (108.08 m-111.1 m) characterised by intensely sheared D<sub>2</sub> sericite-chlorite gouge and phyllitic bands with a broader damage zone of sericite and chlorite fractures, which is also intersected at the base of BH1 (96.57 m-99.24 m).

## 570 5 Discussion

### 5.1 Polyphase evolution of Smøla and the passive margin

Based on our new multiscale and multi-technique results, we now propose a tectonic history for Smøla and elaborate on the bigger-scale implications on the evolution of the passive margin.

575 The D<sub>1</sub> epidote-prehnite mineralisation, although not directly dated in this study, has been shown in other areas of the Norwegian margin to have formed from syn- to post Devonian times down to until ~290 Ma (Indrevær et al., 2014; Seranne, 1992; Sherlock et al., 2004; Watts et al., 2023). The D<sub>1</sub> brittle structures (Figure 4A, B, & Figure 10B) rework primary host rock features, and are systematically offset by the D<sub>2</sub> to D<sub>5</sub> structures, indicating that epidote and prehnite mineralised early, as incipient features, after the emplacement of the SHB rocks and dykes, and prior to all other subsequent deformation episodes (Figure 7).

585 These features can be related to regional-scale D<sub>1</sub> lineaments, oriented NW-SE to NNW-SSE and N-S, which occur over Smøla, the Devonian-aged Edøyfjorden Basin, and the WGR to the SE of the MTFC (Figure 2A & B.I, II, IV, V & Figure 11). Geometrically, these lineaments and structures may have formed during local contraction and folding of the Edøyfjorden Basin during Late-Caledonian extension (Bøe et al., 1989 and Fossen, 2010) (Figure 11). The other D<sub>1</sub> ENE-WSW (varying from NNE-SSW to NW-SE) oriented veins also may represent Riedel shears and tensile veins (veins are mostly orthogonal to the extension opening of the Devonian basins), supporting an association with early brittle sinistral transtension on the MTFC during post-Caledonian extension of the margin (Seranne, 1992; Watts et al., 2023) (Figure 11).

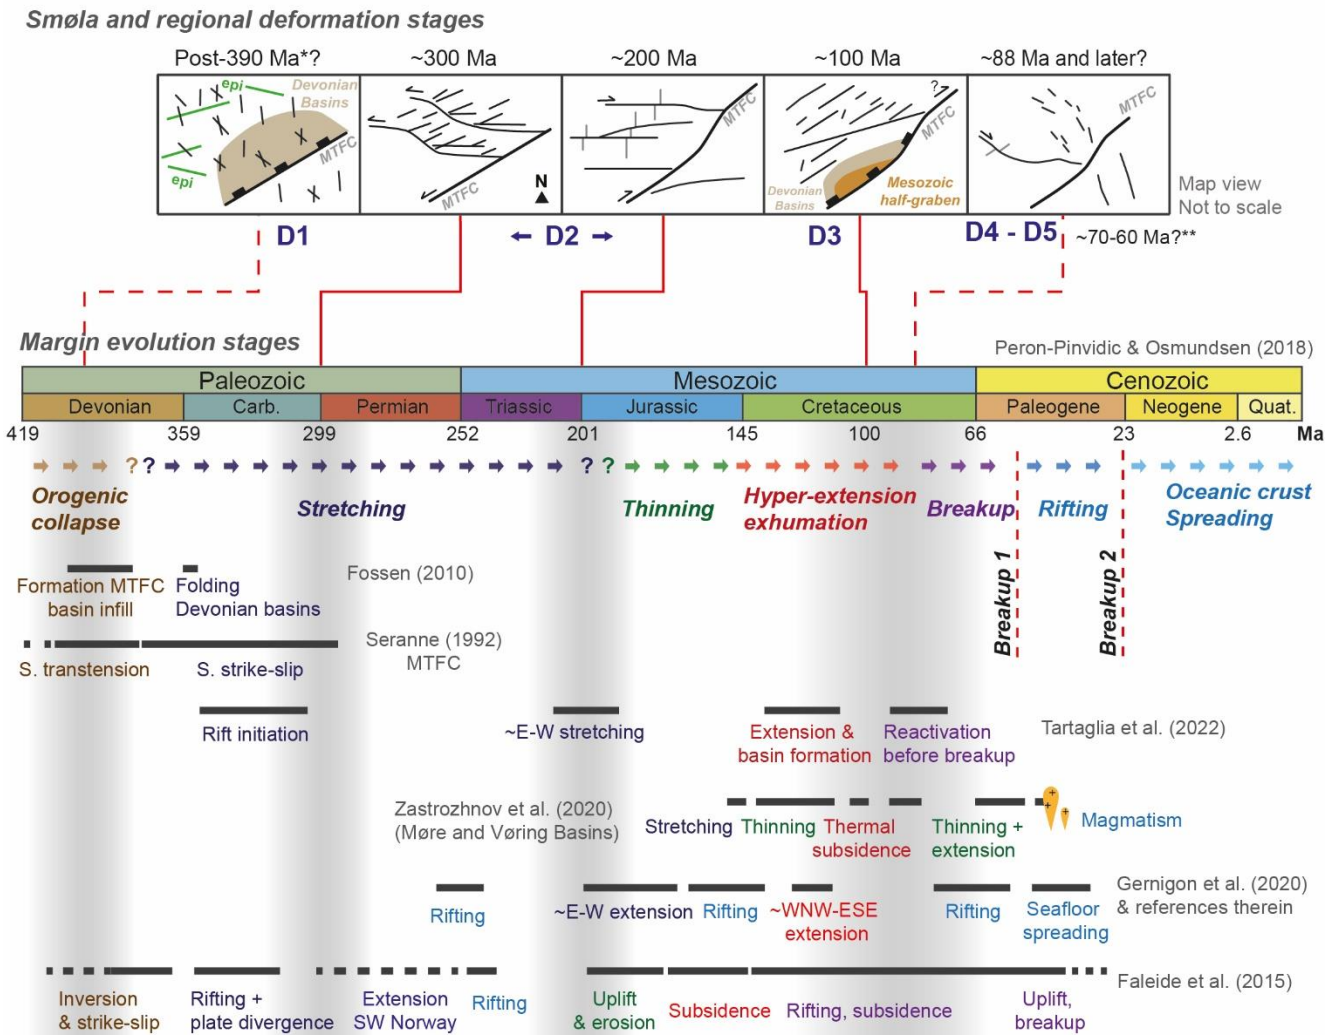

590

**Figure 11. Summary figure integrating this study's results relative to other Mid-Norwegian passive margin evolution studies. The main margin evolution stages are adapted from Peron-Pinvidic and Osmundsen, (2018). Ages provided by \* Fossen et al. (2017), \*\* Hestnes et al. (2023).**

The D<sub>2</sub> sericite-chlorite-carbonate structures (Figure 4C, and Figure 5D & E), dated to between ~300 and ~200 Ma (Figure 9), are associated with the E-W and NE-SW oriented structures (Table 2, Figure 8C, D, & F). The microstructural and field evidence indicates at least two deformation phases accommodated by these structures. The earlier deformation phase, during the Late Carboniferous-Early Permian, may well be attributed to sinistral strike-slip or transtension conditions along the HSF, as suggested by Seranne, (1992) and Watts et al. (2023). The NNE-SSW to NE-SW lineaments on Smøla also have a similar geometry to the ~N-S extensional faults (Raudtinddalen Fault) off the VF, which have been associated with a similar age and kinematics (Watts et al., 2023).

600



The D<sub>2</sub> E-W to WNW-ESE 2<sup>nd</sup> order lineaments and the NE-SW 3<sup>rd</sup> order lineaments (Figure 2B.I & III) indicate sinistral shear with the NE-SW to NNE-SSW lineaments either sinistral R and R' Riedel shears off the E-W WNW-ESE lineaments (Figure 2B.III). Additionally, the E-W to WNW-ESE 2<sup>nd</sup> order lineaments may also be synthetic P-shears off the main MTFC trend (Figure 11), which along with rare examples of preserved sinistral shear along the N-S lineaments over these lineaments (Figure 2B.I) supports this kinematic interpretation.

This Late Carboniferous-Early Permian sinistral strike-slip or transtension potentially corresponds to the overall NE-SW crustal stretching and rifting of the margin during that time, which resulted in the formation of Late Palaeozoic basins such as the Froan Basin and Høybakken fault-related basin (Kendrick et al., 2004; Faleide et al., 2008; Peron-Pinvidic and Osmundsen, 2018).

Reactivating many of the same lineaments, and corresponding to later D<sub>2</sub> deformation (Figure 11), the E-W to WNW-ESE and ENE-WSW lineaments cause dextral offsets of the older N-S and NW-SE lineaments and geophysical anomalies (Figure 2B.I & V). This phase is likely to relate to the ~200 Ma ages detected on these D<sub>2</sub> structures, including the ENE-WSW structures. The dextral offsets over the reactivated 2<sup>nd</sup> order lineaments, and the formation of the ENE-WSW lineaments either as P-shears off the E-W lineaments or as R Riedel shears off the HSF, all imply dextral strike-slip kinematics.

Dextral kinematics has been suggested on the MTFC (primarily on the VF) during the Jurassic by Grønlie and Roberts (1989), with Watts et al. (2023) however suggesting this occurred later during the Late Jurassic/Early Cretaceous on the VF. The dextral strike-slip faulting may be a result of Triassic-Jurassic slab-push forces along the margin focussing on a mechanically weak MTFC and associated structures (including over Smøla) (Pascal & Gabrielsen, 2001; Watts et al., 2023). However, at this time, the margin was experiencing the start of an extensional phase with regional subsidence (Tsikalas et al., 2012; Peron-Pinvidic and Osmundsen, 2018), with commonly ~E-W crustal extension (Gernigon et al., 2020; Tartaglia et al., 2022), which does not fit well with dextral kinematics, suggesting this tectonic phase remains poorly resolved.

The hematite-bearing NNE-SSW and NE-SW oriented structures (Table 2, Figure 8A, G) returned authigenic ages of between ~200 Ma and ~120-100 Ma (Figure 9). These ages correspond to the Triassic-Jurassic dextral strike-slip activity and then Jurassic-Cretaceous dip-slip extension and half-graben development on the HSF, associated with the deposition of the Mesozoic sediment basin sediments (Bøe & Bjerkli, 1989).

Associated with D<sub>3</sub>, the pervasive NE-SW, NNE-SSW lineaments (mostly 3<sup>rd</sup> order) formed after D<sub>1</sub> and D<sub>2</sub>, as suggested by the lack of offset across the earlier lineaments. Moreover, differently to D<sub>2</sub>, the limited horizontal offsets of magnetic fabric





635 over the D<sub>3</sub> lineaments suggest these lineaments are predominantly dip- to oblique-slip faults (Figure 2B.V). Many of the D<sub>3</sub>  
lineaments are subparallel to the trace of the HSF and the axis of the Edøyfjorden Basin, and thus may have developed coevally  
as the basin stretched further and deepened during the Mesozoic. Hyper-extension and exhumation of the margin during the  
Jurassic-Cretaceous drove regional rifting and basin development, forming the significant Cretaceous basins (including the  
Møre and Vøring basins; Figure 11) (Faleide et al., 2008; Peron-Pinvidic and Osmundsen, 2018).

640 Following this, gentle folding of the Mesozoic basin rocks around N-S oriented fold axes occurred during late D<sub>3</sub> times (Bøe  
& Bjerkli, 1989). Geometrically, these folds indicate Late Mesozoic dextral transpressional conditions after dip-slip faulting  
on the HSF, with ~E-W shortening of the basin sediments (Bøe & Bjerkli, 1989). Watts et al. (2023) however, related the late  
dextral strike-slip kinematics to zeolite-calcite mineralisation on the VF (less distinct on the HSF; D<sub>4</sub> in this study).

645 The D<sub>4</sub> zeolite and calcite structures, which from field evidence cross-cut the D<sub>1</sub> to D<sub>3</sub> features (Figure 4E & F, and Figure  
5G), are not directly dated in this study. However, these veins may have formed after ~150 Ma to ~75 Ma (Table 2, Figure 8B,  
& Figure 9), owing to cross-cutting relationships (Figure 8B). Similar zeolite-calcite mineralisation has been identified by  
Tartaglia et al. (2022) and Watts et al. (2023) in other parts of the margin (Hitra and Runde Islands) and on the Fosen Peninsula,  
650 where it is associated with the VF (only locally occurring along the HSF). These other studies link the zeolite-calcite structures  
to a combination of earlier Mesozoic dextral strike-slip to transpressional faulting related to the N-S folds in the Edøyfjorden  
Basin (D<sub>3</sub> structures), later extensional dip-slip faulting on the HSF post-dating the zeolite-calcite features (Watts et al., 2023),  
or Late Cretaceous extension in the distal part of the rift margin (Gernigon et al., 2020; Tartaglia et al., 2022).

655 The NE-SW, NNW-SSE to WNW-ESE D<sub>4</sub> strike trends may therefore preserve evidence of both the earlier Mesozoic  
(Jurassic) dextral strike-slip movement on the MTFC, associated with the NNW-SSE to WNW-ESE trends and the later  
Cretaceous to Late Cretaceous extension corresponding to the most frequent orientation trend NE-SW.

Representing the last Cretaceous-Palaeocene deformation episode, the D<sub>5</sub> quartz-calcite veins (Figure 4F, and Figure 5H & I)  
660 are similar to calcite veins analysed for U-Pb ages in SW Norway and the WGR (Hestnes et al., 2023). Different veins oriented  
NE-SW returned ages of ~90 Ma to ~80 Ma, associated with Cretaceous reactivation of the MTFC; ~NW-SE (and NE-SW)  
veins forming ~70 Ma to 60 Ma, associated with regional uplift owing to doming of the proto-Icelandic plume; and NE-SW  
veins forming <50 Ma, associated with different Cenozoic extensional process (lithospheric flexure, uplift from far-field  
tectonic stresses) (Hestnes et al., 2023).

665 Regionally, the lineament trends associated with both D<sub>4</sub> and D<sub>5</sub> crosscut all the other lineaments (Figure 2B.IV & VI)  
indicating they are indeed late features. Similar subparallel lineaments are present in isolated parts of Smøla, and to the SE of  
the HSF in the WGR (Figure 11). Subparallel to the NW-SE D<sub>4</sub> and D<sub>5</sub> lineaments, there are NW-SE SW/NE-dipping normal



670 faults offsetting the Mesozoic sediments within the Edøyfjorden Basin, which are orthogonal to the HSF (Bøe & Bjerkli, 1989). Overall, the geometries of these faults, lineament, and vein orientations suggest ~E-W to NE-SW crustal extension on average.

Based on geometry and timing, the D<sub>4</sub> and D<sub>5</sub> structures potentially relate to both the Cretaceous reactivation of the MTFC and the Cretaceous-Palaeocene rifting preceding the break-up of Greenland and Norway (Faleide et al., 2008). Importantly, the D<sub>4</sub> and D<sub>5</sub> features are subparallel to extensional structures offshore, particularly to the bounding Klakk Fault Complex on the western side of the Frøya High, the Halten Terrace, as well as the HD to the NW of Hitra and Frøya, suggesting a temporal and geometric association.

## 5.2 Application to and implications for the Frøya High offshore domain

680 Frøya High, being analogous to Smøla, is bound to the west by the Klakk Fault Complex, a major west-dipping extensional fault zone, with intrabasement structures located in the footwall of this structure (Muñoz-Barrera et al., 2020). The Frøya High experienced polyphase deformation related to stretching and thinning of the margin during the mid-Carboniferous, Permian-Triassic, and rifting basin development during the Late Jurassic-Early Cretaceous, and eventual break-up during the Late Cretaceous-Palaeocene rifting (Faleide et al., 2008, 2015; Peron-Pinvidic and Osmundsen, 2018). Therefore, the integrated multi-technique approach, and the results of our study on Smøla, which has unravelled a complex polyphase tectonic history, could well be applied to an offshore basement volume such as Frøya High.

685 The crucial toolset in this study has been four diamond drill holes (Figure 3) in addition to regional datasets including the airborne magnetic data (Figure 2). Numerous drill holes have been completed along the mid-Norway margin (e.g., Slagstad et al., 2008; Bunkholt et al., 2022), with the drill holes over the Frøya High summarised in *Table 5*. The drill hole material from these holes involves only rock cuttings or rock plugs (Muñoz-Barrera et al., 2020). This, along with the lack of drill hole orientation and spatial data available, further highlights how the results from this study on Smøla can assist in constraining basement highs offshore.

695 Similarly, margin-wide geophysical (magnetic, gravity, and 2D, 3D seismic reflection surveys) datasets are also available (Muñoz-Barrera et al., 2020; Skilbrei et al., 2002). Recently, utilising many of these datasets, Muñoz-Barrera et al. (2020) was able to determine seismic-resolution-scale geometric and segmentation characterisation of the Klakk Fault Complex, as well as identifying three major intrabasement structures within the Frøya High. Additionally, Gresseth et al. (2023) made use of 2D and 3D seismic reflection data to produce 3D geometric and evolution constraints of the Klakk Fault Complex. Both these studies, however, involved interpretations within the seismic resolution-scale, with little information regarding the sub-seismic resolution intrabasement structures. Therefore, to achieve a similar resolution as the Smøla tectonic evolution framework, detailed structural logging of the available drill core/rock cuttings and the ability to undertake microstructural analyses is required.



**Table 5. Drill holes over Frøya High with details provided by Slagstad et al. (2008), and U-Pb ages of zircon in basement rocks (\*) by Slagstad et al. (2011).**

| Drill ID  | End of hole depth (m) | Top of basement (m) | Geology                 | Area                      | U-Pb ages*     |
|-----------|-----------------------|---------------------|-------------------------|---------------------------|----------------|
| 6407/10-3 | 2972.1                | 2959.0              | Granite                 | Frøya High                | 436.6 ± 4.4 Ma |
| 6306/10-1 | 3158.5                | 2989.0              | Diorite                 | Møre Basin/<br>Frøya High | 446.9 ± 4.1 Ma |
| 6305/12-2 | 3158.3                | 3145.0              | Brecciated<br>siltstone | Møre Basin                | n/a            |

705

Fractured and weathered basement is a critical research area in terms of characterising basement-hosted oil and gas reservoirs or fluid pathways (Trice, 2014; Trice et al., 2022). Although out of the scope of this study, the petrophysical attributes of the different deformation features which are related to the D<sub>1</sub> to D<sub>5</sub> deformation episodes may have significant effects on fluid migration or storage along and within relevant deformation features. As these features exhibit cross-cutting relationships and different orientation trends, structural permeability anisotropy is clearly present in the Smøla basement volume. Therefore, producing high resolution structural characterisations aided by the absolute time dimension, may be crucial in understanding basement-hosted plays offshore.

710

## 6 Conclusions

The toolbox approach proposed by this study, integrating various methodologies and data types including multiscalar geophysical, drill core, outcrop, 3D modelling, microstructural datasets, and geochronological results, results in the following key conclusions:

715

1) From regional to microscale evidence, at least five distinct tectonic events have been recognised as having affected Smøla since the Devonian (Figure 11):

720

I. The earliest syn- to post-Devonian ENE-WSW, WNW-ESE to NW-SE striking epidote-prehnite brittle structures are associated with brittle sinistral transtension along the MTFC, owing to post-Caledonian extension of the margin.

725

II. Subsequently, Carboniferous to Late Triassic NE-SW or NW-SE striking sericite-chlorite-calcite shear features, are linked to at least two brittle-ductile phases, associated with sinistral and dextral strike-slip faulting along the MTFC. NE-SW crustal stretching and rifting of the margin, Late Palaeozoic basins formation relate to the sinistral faulting, and possible late margin-wide slab-push forces acting on the MTFC resulted in the dextral faulting.

III. Next, NE-SW, NNE-SSW to N-S striking chloritic-hematite breccias and gouges, which developed owing to Mesozoic crustal extension, basin development, with hematite being introduced from migrating hydrothermal fluids along basin flanking structures.





- 730 IV. Later, NE-SW to NNW-SSE and WNW-ESE striking hematite-zeolite-calcite structures, frequently associated with reactivated pre-existing features, is related to both late Mesozoic dextral strike-slip movement on the MTFC, and ~E-W crustal extension owing to regional stretching and rifting.
- V. The final, possible Cretaceous to Paleogene NW-SE, WNW-ESE and NNE-SSW striking quartz-calcite veins which cross-cutting all previous deformation features. These mostly tensile veins may have formed from continued ~E-W/ NE-SW crustal extension of the margin.
- 735 2) The 3D modelling of the structures demonstrates the complex geometric characteristics of basement deformation, with the features all forming intricate cross-cutting and intersecting structural arrays. Structures corresponding to different deformation episodes require modelling at different scales, with the structures possessing various aperture widths, down-dip and strike extents by deformation episode. Overall, the  $D_2$  structures possess the greatest size/strike extents, and the  $D_1$  features the most localised. Additionally, the modelling confirms that some of the features can be linked to adjacent major structures, such as the  $D_2$  structures being inclined splays from the nearby major E-W structures.
- 740 3) Dating of fault gouge material by K-Ar geochronology yielded ages from  $314.9 \pm 5.4$  Ma to  $74.7 \pm 1.7$  Ma, associated with structures related to different deformation episodes. The results associated with the  $D_2$  structures involve K-Ar age results of between ~300 Ma and ~200 Ma, with the  $D_3$  structures associated with younger ages of ~200 Ma to ~100 Ma, and associated  $D_4$  structures providing ages of ~150 Ma to ~75 Ma.
- 745 This study therefore offers a promising approach to unravelling the tectonic evolution and structural characterisation of basement blocks that have accommodated long and complex geological histories. The toolbox approach used here also has application in the offshore domain and may help to further understand offshore basement structures such as the Frøya High, and fracture-hosted unconventional hydrocarbon reservoirs related to these basement features.

### Data availability

- 750 Relevant data analysed including lineament shapefiles, field, drill structural, and XRD and K-Ar geochronology data are available at <https://data.mendeley.com/datasets/2nmr2cz9yy/1> (last access 27 October 2023).

### Supplement

The supplement related to this article is available online at: <https://data.mendeley.com/datasets/2nmr2cz9yy/1>



### Author contributions

755 MH undertook conceptualisation, data collection, sample collection, data curation, formal analysis, investigation, validation, writing-original draft and review and editing, and figure preparation. GVK did conceptualisation, data collection, sample collection, writing-final draft and review and editing. JK performed funding acquisition, conceptualisation, contribution-final draft, and review. RvdL undertook sample collection, K-Ar geochronology laboratory analyses, writing-final draft and review and editing. JS did XRD, and K-Ar geochronology laboratory analyses, writing-final draft and review and editing. ØN  
760 performed data collection, writing-final draft and review and editing. MB managed the drilling on Smøla Island. AN, undertook data collection, writing-final draft and review and editing. GV undertook funding acquisition, project administration, conceptualisation, data collection, sample collection, PhD project supervision, writing-final draft and review and editing.

### Financial support

This research has been supported by the ongoing BASE 3 project (“BASE – Basement fracturing and weathering on - and offshore Norway”); and the Research Council of Norway (Norges Forskningsråd), grant no. 319849. BASE is a joint research project launched and steered by the Geological Survey of Norway (NGU), with the industry partners Equinor ASA, Lundin Norway AS, AkerBP ASA, Spirit Energy Norway AS, and Wintershall-Dea Norway AS, and the Norges Forskningsråd (NFR).

### Acknowledgements

We thank all the BASE colleagues for the continuous discussion and constructive inputs. The NGU petrography laboratory is  
770 thanked for the assistance in the preparation of the thin sections. Also, all the colleagues at the University of Bologna are specially thanked for their continual support and encouragement.

### References

- Belaidi, A., Bonter, D.A., Slightam, C., and Trice, R.C., 2018, The Lancaster Field: Progress in opening the UK’s fractured basement play: Petroleum Geology Conference Proceedings, v. 8, p. 385–398, doi:10.1144/PGC8.20.
- 775 Blenkinsop, T., Doyle, M., and Nugus, M., 2015, A unified approach to measuring structures in orientated drill core, in Geological Society Special Publication, Geological Society of London, v. 421, p. 99–108, doi:10.1144/SP421.1.
- Bøe, R., Atakan, K., and Sturt, B.A., 1989, The style of deformation in on Hitra and Smøla. Central: Norges Geologiske Undersøkelse Bulletin, v. 414, p. 1–19.



- Bøe, R., and Bjerkli, K., 1989, Mesozoic sedimentary rocks in Edøyfjorden and Beitstadfjorden, Central Norway: Implications  
780 for the structural history of the Møre-Trøndelag Fault Zone: *Marine Geology*, v. 87, p. 287–299,  
doi:[https://doi.org/10.1016/0025-3227\(89\)90066-2](https://doi.org/10.1016/0025-3227(89)90066-2).
- Bonter, D.A., and Trice, R., 2019, An integrated approach for fractured basement characterization: The Lancaster field, a case  
study in the UK: *Petroleum Geoscience*, v. 25, p. 400–414, doi:[10.1144/petgeo2018-152](https://doi.org/10.1144/petgeo2018-152).
- Brunton, D.L., and Bockelie, J.F., 1979, The Ordovician Sedimentary Sequence on Smøla, West Central Norway: *Norges*  
785 *Geologiske Undersøkelse Bulletin*, v. 348, p. 21–31.
- Bunkholt, H.S.S., Oftedal, B.T., Hansen, J.A., Løseth, H., and Kløvjan, O.S., 2022, Trøndelag Platform and Halten–Dønna  
Terraces Composite Tectono-Sedimentary Element, Norwegian Rifted Margin, Norwegian Sea: *Geological Society, London,*  
*Memoirs*, v. 57, doi:[10.1144/m57-2017-13](https://doi.org/10.1144/m57-2017-13).
- Ceccato, A., Viola, G., Tartaglia, G., and Antonellini, M., 2021, In-situ quantification of mechanical and permeability  
790 properties on outcrop analogues of offshore fractured and weathered crystalline basement: Examples from the Rolvsnes  
granodiorite, Bømlo, Norway: *Marine and Petroleum Geology*, v. 124, doi:[10.1016/j.marpetgeo.2020.104859](https://doi.org/10.1016/j.marpetgeo.2020.104859).
- Corfu, F., Andersen, T.B., and Gasser, D., 2014, The Scandinavian Caledonides: Main features, conceptual advances and  
critical questions: *Geological Society Special Publication*, v. 390, p. 9–43, doi:[10.1144/SP390.25](https://doi.org/10.1144/SP390.25).
- Davids, C., Wemmer, K., Zwingmann, H., Kohlmann, F., Jacobs, J., and Bergh, S.G., 2013, K-Ar illite and apatite fission  
795 track constraints on brittle faulting and the evolution of the northern Norwegian passive margin: *Tectonophysics*, v. 608, p.  
196–211, doi:[10.1016/j.tecto.2013.09.035](https://doi.org/10.1016/j.tecto.2013.09.035).
- Drake, H., Tullborg, E.L., and Page, L., 2009, Distinguished multiple events of fracture mineralisation related to far-field  
orogenic effects in Paleoproterozoic crystalline rocks, Simpevarp area, SE Sweden: *Lithos*, v. 110, p. 37–49,  
doi:[10.1016/J.LITHOS.2008.12.003](https://doi.org/10.1016/J.LITHOS.2008.12.003).
- 800 Faleide, J.I., Bjørlykke, K., and Gabrielsen, R.H., 2015, Geology of the Norwegian Continental Shelf, in Bjørlykke, K. ed.,  
*Petroleum Geoscience: From Sedimentary Environments to Rock Physics*, Berlin, Heidelberg, Springer Berlin Heidelberg, p.  
603–637, doi:[10.1007/978-3-642-34132-8\\_25](https://doi.org/10.1007/978-3-642-34132-8_25).
- Faleide, J.I., Tsikalas, F., Breivik, A.J., Mjelde, R., Ritzmann, O., Engen, Ø., Wilson, J., and Eldholm, O., 2008, Structure and  
evolution of the continental margin off Norway and the Barents Sea: *International Union of Geological Sciences*, v. 31, p. 82–  
805 91, doi:[10.18814/epiugs/2008/v31i1/012](https://doi.org/10.18814/epiugs/2008/v31i1/012).
- Fediuk, F., and Siedlecki, S., 1977, Smøla. Description of the geological map (AMS-M 711) 1321 I - 1:50 000:  
Universitetsforlaget.
- Fossen, H., 2010, Extensional tectonics in the North Atlantic Caledonides: A regional view: *Geological Society Special*  
*Publication*, v. 335, doi:[10.1144/SP335.31](https://doi.org/10.1144/SP335.31).
- 810 Fossen, H., 1992, The role of extensional tectonics in the Caledonides of South Norway: *Journal of Structural Geology*, v. 14,  
p. 1033–1046.





- Fossen, H., Khani, H.F., Faleide, J.I., Ksienzyk, A.K., and Dunlap, W.J., 2017, Post-Caledonian extension in the West Norway-northern North Sea region: The role of structural inheritance, in Geological Society Special Publication, Geological Society of London, v. 439, p. 465–486, doi:10.1144/SP439.6.
- 815 Fossen, H., Ksienzyk, A.K., Rotevatn, A., Bauck, M.S., and Wemmer, K., 2021, From widespread faulting to localised rifting: Evidence from K-Ar fault gouge dates from the Norwegian North Sea rift shoulder: Basin Research, v. 33, p. 1934–1953, doi:10.1111/bre.12541.
- Gautneb, H., 1988, Structure, age and formation of dykes on the island of Smøla, Central Norway: Norsk geologisk tidsskrift, v. 68, p. 275–288.
- 820 Gautneb, Ha., and Roberts, D., 1989, Geology and petrochemistry of the Smøla-Hitra batholith, Central Norway: Norges Geologiske Undersøkelse Bulletin, v. 416, p. 1–24.
- Gee, D.G., Fossen, H., Henriksen, N., and Higgins, A.K., 2008, From the Early Paleozoic Platforms of Baltica and Laurentia to the Caledonide Orogen of Scandinavia and Greenland: International Union of Geological Sciences, v. 31, p. 44–51, doi:10.18814/epiugs/2008/v31i1/007.
- 825 Geological Survey of Norway, 2021, Bedrock map of Norway 1:1 350 000.:
- Gernigon, L., Franke, D., Geoffroy, L., Schiffer, C., Foulger, G.R., and Stoker, M., 2020, Crustal fragmentation, magmatism, and the diachronous opening of the Norwegian-Greenland Sea: Earth-Science Reviews, v. 206, p. 102839, doi:10.1016/J.EARSCIREV.2019.04.011.
- Gillespie, P.A., Holdsworth, R.E., Long, D., Williams, A., and Gutmanis, J.C., 2020, Introduction: geology of fractured reservoirs: Journal of the Geological Society, v. 178, p. jgs2020-197, doi:10.1144/jgs2020-197.
- 830 Gresseth, J.L.S., Osmundsen, P.T., and Péron-Pinvidic, G., 2023, 3D Evolution of Detachment Fault Systems in Necking Domains: Insights From the Klakk Fault Complex and the Frøya High, Mid-Norwegian Rifted Margin: Tectonics, v. 42, p. e2022TC007600, doi:https://doi.org/10.1029/2022TC007600.
- Grønlie, A., and Roberts, D., 1989, Resurgent strike-slip duplex development along the Hitra-Snåsa and Verran Faults, Møre-trøndelag fault zone, Central Norway: Journal of Structural Geology, v. 11, p. 295–305, doi:10.1016/0191-8141(89)90069-2.
- 835 Hartz, E.H., B. Martinsen, B., Øverli, P.E., Lie, H., Ditcha, E.M., Schmid, D.W., and Medvedev, S., 2013, Newly Discovered Giant Oil Fields of North Sea - The Role of Fractured Basement Highs, in European Association of Geoscientists & Engineers, p. cp-365-00017, doi:10.3997/2214-4609.20131805.
- Hestnes, Å., Drost, K., Sømme, T.O., Gasser, D., Scheiber, T., Linge, H., Chew, D., and Jacobs, J., 2023, Constraining the tectonic evolution of rifted continental margins by U-Pb calcite dating:, doi:10.1038/s41598-023-34649-z.
- 840 Holcombe, R., 2013, Oriented Drillcore: Measurement, Conversion and QA/QC Procedures for Structural and Exploration Geologists: <http://www.holcombe-coughlinoliver.com/downloads/>.
- Holdsworth, R.E., McCaffrey, K.J.W., Dempsey, E., Roberts, N.M.W., Hardman, K., Morton, A., Feely, M., Hunt, J., Conway, A., and Robertson, A., 2019, Natural fracture propping and earthquake-induced oil migration in fractured basement reservoirs: Geology, v. 47, p. 700–704, doi:10.1130/G46280.1.
- 845



- Indrevær, K., Stunitz, H., and Bergh, S.G., 2014, On Palaeozoic–Mesozoic brittle normal faults along the SW Barents Sea margin: Fault processes and implications for basement permeability and margin evolution: *Journal of the Geological Society*, v. 171, p. 831–846, doi:10.1144/jgs2014-018.
- 850 Kendrick, M.A., Eide, A., Roberts, D., and Osmundsen, P.T., 2004, The Middle to Late Devonian Høybakken detachment, central Norway: 40Ar–39Ar evidence for prolonged late/post-Scandian extension and uplift: *Geological Magazine*, v. 141, p. 329–344, doi:10.1017/S0016756803008811.
- Ksienzyk, A.K., Wemmer, K., Jacobs, J., Fossen, H., Schomberg, A.C., Süssenberger, A., Lünsdorf, N.K., and Bastesen, E., 2016, Post-Caledonian brittle deformation in the Bergen area, West Norway: results from K–Ar illite fault gouge dating: *Norwegian Journal of Geology*, v. 96, p. 275–299, doi:10.17850/njg96-3-06.
- 855 Mosar, J., Eide, E.A., Osmundsen, P.T., Sommaruga, A., and Torsvik, T.H., 2002, Greenland – Norway separation: A geodynamic model for the North Atlantic: *Norwegian Journal of Geology*, v. 82, p. 282–299.
- Muñoz-Barrera, J.M., Rotevatn, A., Gawthorpe, R.L., Henstra, G.A., and Kristensen, T.B., 2020, The role of structural inheritance in the development of high-displacement crustal faults in the necking domain of rifted margins: The Klakk Fault Complex, Frøya High, offshore mid-Norway: *Journal of Structural Geology*, v. 140, doi:10.1016/j.jsg.2020.104163.
- 860 Nasuti, A., Olesen, O., Baranwal, O., and Dumais, M., 2015, Compilation of aeromagnetic data, in Olesen, O. et al. eds., *Coop Phase 2 - Crustal Onshore-Offshore Project*. NGU confidential Report, *Norges Geologiske Undersøkelse*, v. 063, p. 11–24.
- Olsen, E., Gabrielsen, R.H., Braathen, A., and Redfield, T.F., 2007, Fault systems marginal to the Møre-Trøndelag Fault Complex, Osen-Vikna area, Central Norway: *Norwegian Journal of Geology*, v. 87, p. 59–73.
- Osmundsen, P.T., Eide, E.A., Haabesland, N.E., Roberts, D., Andersen, T.B., Kendrick, M., Bingen, B., Braathen, A., and 865 Redfield, T.F., 2006, Kinematics of the Høybakken detachment zone and the Møre–Trøndelag Fault Complex, central Norway: *Journal of the Geological Society*, v. 163, p. 303–318, doi:10.1144/0016-764904-129.
- Pascal, C., and Gabrielsen, R.H., 2001, Numerical modeling of Cenozoic stress patterns in the mid-Norwegian margin and the northern North Sea: *Tectonics*, v. 20, p. 585–599, doi:<https://doi.org/10.1029/2001TC900007>.
- Peron-Pinvidic, G., Manatschal, G., and Osmundsen, P.T., 2013, Structural comparison of archetypal Atlantic rifted margins: 870 A review of observations and concepts: *Marine and Petroleum Geology*, v. 43, p. 21–47, doi:10.1016/J.MARPETGEO.2013.02.002.
- Peron-Pinvidic, G., and Osmundsen, P.T., 2020, From orogeny to rifting: insights from the Norwegian ‘reactivation phase’: *Scientific Reports*, v. 10, doi:10.1038/s41598-020-71893-z.
- Peron-Pinvidic, G., and Osmundsen, P.T., 2018, The Mid Norwegian - NE Greenland conjugate margins: Rifting evolution, margin segmentation, and breakup: *Marine and Petroleum Geology*, v. 98, p. 162–184, doi:10.1016/j.marpetgeo.2018.08.011.
- 875 Redfield, T.F., Torsvik, T.H., Andriessen, P.A.M., and Gabrielsen, R.H., 2004, Mesozoic and Cenozoic tectonics of the Møre Trøndelag Fault Complex, central Norway: constraints from new apatite fission track data: *Physics and Chemistry of the Earth, Parts A/B/C*, v. 29, p. 673–682, doi:<https://doi.org/10.1016/j.pce.2004.03.005>.



- Riber, L., Dypvik, H., and Sørli, R., 2015, Altered basement rocks on the Utsira High and its surroundings, Norwegian North  
880 Sea: *Norwegian Journal of Geology*, v. 95, p. 57–89.
- Roberts, D., 1980, Petrochemistry and palaeogeographic setting of the Ordovician volcanic rocks of Smøla, central Norway: *Norges Geologiske Undersøkelse Bulletin*, v. 359, p. 43–60.
- Roberts, D., and Gee, D.G., 1985, An introduction to the structure of the Scandinavian Caledonides., in *The Caledonide orogen–Scandinavia and related areas*, v. Part 1, p. 55–68.
- 885 Rønning, J.S., and Elvebakk, H., 2005, Onshore-Offshore Resistivity studies. Basement resistivity at the Frøya High.:  
Scheiber, T., and Viola, G., 2018, Complex Bedrock Fracture Patterns: A Multipronged Approach to Resolve Their Evolution  
in Space and Time: *Tectonics*, v. 37, p. 1030–1062, doi:10.1002/2017TC004763.
- Scheiber, T., Viola, G., Wilkinson, C.M., Ganerød, M., Skår, Ø., and Gasser, D., 2016, Direct  $^{40}\text{Ar}/^{39}\text{Ar}$  dating of Late  
Ordovician and Silurian brittle faulting in the southwestern Norwegian Caledonides: *Terra Nova*, v. 28, p. 374–382,  
890 doi:10.1111/ter.12230.
- Seequent, T.B.S.C., 2022, Leapfrog Works:  
Seranne, M., 1992, Late Paleozoic kinematics of the Møre-Trøndelag Fault Zone and adjacent areas, central Norway: *Norsk  
Geologisk Tidsskrift*, v. 72, p. 141–158.
- Sherlock, S.C., Watts, L.M., Holdsworth, R.E., and Roberts, D., 2004, Dating fault reactivation by Ar/Ar laserprobe: an  
895 alternative view of apparently cogenetic mylonite–pseudotachylite assemblages: *Journal of the Geological Society*, v. 161, p.  
335–338, doi:10.1144/0016-764903-160.
- Skilbrei, J.R., Olesen, O., Osmundsen, P.T., Kihle, O., Aaro, S., and Fjellanger, E., 2002, A study of basement structures and  
onshore-offshore correlations in Central Norway.: *Norwegian Journal of Geology*, v. 82, p. 263–279.
- Slagstad, T., Davidsen, B., and Stephen Daly, J., 2011, Age and composition of crystalline basement rocks on the norwegian  
900 continental margin: Offshore extension and continuity of the Caledonian-Appalachian orogenic belt: *Journal of the Geological  
Society*, v. 168, p. 1167–1185, doi:10.1144/0016-76492010-136.
- Slagstad, T., and Kirkland, C.L., 2018, Timing of collision initiation and location of the Scandian orogenic suture in the  
Scandinavian Caledonides: *Terra Nova*, v. 30, p. 179–188, doi:10.1111/ter.12324.
- Slagstad, T., Ramstad, R.K., Davidsen, B., and Barrère, C., 2008, Petrophysical and thermal properties of pre-Devonian  
905 basement rocks on the Norwegian continental margin:
- Stober, I., and Bucher, K., 2007, Hydraulic properties of the crystalline basement: *Hydrogeology Journal*, v. 15, p. 213–224,  
doi:10.1007/s10040-006-0094-4.
- Tanner, D.C., Bunes, H., Igel, J., Günther, T., Gabriel, G., Skiba, P., Plenefisch, T., Gestermann, N., and Walter, T.R., 2020,  
Fault detection: *Understanding Faults: Detecting, Dating, and Modeling*, p. 81–146, doi:10.1016/B978-0-12-815985-9.00003-  
910 5.
- Tartaglia, G., Ceccato, A., Scheiber, T., van der Lelij, R., Schönenberger, J., and Viola, G., 2022, Time-constrained multiphase  
brittle tectonic evolution of the onshore mid-Norwegian passive margin: *GSA Bulletin*, doi:10.1130/b36312.1.



- Trice, R., 2014, Basement exploration, West of Shetlands: Progress in opening a new play on the UKCS: Geological Society Special Publication, v. 397, p. 81–105, doi:10.1144/SP397.3.
- 915 Trice, R., Hiorth, C., and Holdsworth, R., 2022, Fractured basement play development on the UK and Norwegian rifted margins:  
Tsikalas, F., Faleide, J.I., Eldholm, O., and Blaich, O.A., 2012, The NE Atlantic conjugate margins: Regional Geology and Tectonics: Phanerozoic Passive Margins, Cratonic Basins and Global Tectonic Maps, p. 140–201, doi:10.1016/B978-0-444-56357-6.00004-4.
- 920 Tucker, R.D., Robinson, P., Solli, A., Gee, D.G., Thorsnes, T., Krogh, T.E., Nordgulen, Ø., and Bickford, M.E., 2004, Thrusting and Extension in the Scandian Hinterland, Norway: New U-Pb Ages and Tectonostratigraphic Evidence: American Journal of Science, v. 304, p. 477–532.  
Viola, G., Scheiber, T., Fredin, O., Zwingmann, H., Margreth, A., and Knies, J., 2016, Deconvoluting complex structural histories archived in brittle fault zones: Nature Communications, v. 7, doi:10.1038/ncomms13448.
- 925 Viola, G., Torgersen, E., Mazzarini, F., Musumeci, G., van der Lelij, R., Schönenberger, J., and Garofalo, P.S., 2018, New Constraints on the Evolution of the Inner Northern Apennines by K-Ar Dating of Late Miocene-Early Pliocene Compression on the Island of Elba, Italy: Tectonics, v. 37, p. 3229–3243, doi:https://doi.org/10.1029/2018TC005182.  
Viola, G., Venvik Ganerød, G., and Wahlgren, C.-H., 2009, Unraveling 1.5 Ga of brittle deformation history in the Laxemar-Simpevarp area, southeast Sweden: A contribution to the Swedish site investigation study for the disposal of highly radioactive  
930 nuclear waste:, doi:10.1029/2009TC002461.  
Watts, L.M., 2001, The walls boundary fault zone and the Møre Trøndelag fault complex: a case study of two reactivated fault zones. [PhD thesis]: Durham University, 0–550 p.  
Watts, L.M., Holdsworth, R.E., Roberts, D., Sleight, J.M., and Walker, R.J., 2023, Structural evolution of the reactivated Møre-Trøndelag Fault Complex, Fosen Peninsula, Norway: Journal of the Geological Society, doi:10.1144/jgs2022-139.
- 935 White, N. C. (2014). Geological Interpretation of Aeromagnetic Data (David J. Isles and Leigh R. Rankin). Economic Geology, 109(5), 1495–1496. https://doi.org/10.2113/econgeo.109.5.1495.  
Zastrozhnov, D., Gernigon, L., Gogin, I., Planke, S., Abdelmalak, M.M., Polteau, S., Faleide, J.I., Manton, B., and Myklebust, R., 2020, Regional structure and polyphased Cretaceous-Paleocene rift and basin development of the mid-Norwegian volcanic passive margin: Marine and Petroleum Geology, v. 115, doi:10.1016/j.marpetgeo.2020.104269.
